# Supplementary material for: Serine ADP-ribosylation reversal by the hydrolase ARH3
Source: eLife. 2017 Jun 26;6:e28533. doi: 10.7554/eLife.28533 (PMC5552275; doi:10.7554/eLife.28533)
Supplement: Figure 1—source data 1. — ADPr identified peptide features from SILAC experiments performed to quantify ADPr after different time points of 2 mM H2O2–induced DNA damage (Figure 1—figure supplement 1). DOI: http://dx.doi.org/10.7554/eLife.28533.004 [file elife-28533-fig1-data1.xlsx]

## Sheet: 0 min
Sequence	Modified.sequence	Proteins	Leading.proteins	Leading.razor.protein	Protein.names	Experiment	MS.MS.m.z	Charge	m.z	Mass	Mass.Error..ppm.	Mass.Error..Da.	Uncalibrated.Mass.Error..ppm.	Uncalibrated.Mass.Error..Da.	PEP	Score	Ratio.H.L	Ratio.H.L.normalized	Intensity	Intensity.L	Intensity.H
ARTKQTARKSTGGKAPR	_ARTKQTARKS(ad)TGGK(ac)APR_	K7EP01;Q16695;P68431;Q6NXT2;Q5TEC6;P84243;K7EMV3;B4DEB1;Q71DI3	K7EP01;Q16695;P68431;Q5TEC6;P84243;Q71DI3	Q71DI3	Histone H3.1t;Histone H3.1;Histone H3.3C;Histone H3;Histone H3.3;Histone H3.2	0min	600.285	4	600.035	2396.11	-0.05321	-3.1928e-05	NA	NA	8.323e-05	66.809	0.039853	0.039266	36272000	35033000	1238600
KSTGGKAPR	_KS(ad)TGGK(ac)APR_	K7EP01;Q16695;P68431;Q6NXT2;Q5TEC6;P84243;K7EMV3;B4DEB1;Q71DI3	K7EP01;Q16695;P68431;Q5TEC6;P84243;Q71DI3	Q71DI3	Histone H3.1t;Histone H3.1;Histone H3.3C;Histone H3;Histone H3.3;Histone H3.2	0min	742.801	2	742.8	1483.59	NA	NA	NA	NA	0.00063265	60.398	NA	NA	NA	NA	NA
KSTGGKAPR	_KS(ad)TGGK(ac)APR_	K7EP01;Q16695;P68431;Q6NXT2;Q5TEC6;P84243;K7EMV3;B4DEB1;Q71DI3	K7EP01;Q16695;P68431;Q5TEC6;P84243;Q71DI3	Q71DI3	Histone H3.1t;Histone H3.1;Histone H3.3C;Histone H3;Histone H3.3;Histone H3.2	0min	742.801	2	742.8	1483.59	0.41705	0.00030978	NA	NA	0.00037256	70.563	0.027873	0.026568	34490000	33993000	496490
KSTGGKAPR	_KS(ad)TGGK(ac)APR_	K7EP01;Q16695;P68431;Q6NXT2;Q5TEC6;P84243;K7EMV3;B4DEB1;Q71DI3	K7EP01;Q16695;P68431;Q5TEC6;P84243;Q71DI3	Q71DI3	Histone H3.1t;Histone H3.1;Histone H3.3C;Histone H3;Histone H3.3;Histone H3.2	0min	495.536	3	495.536	1483.59	0.23541	0.00011666	NA	NA	0.00046677	67.252	NA	NA	24552000	24234000	317790
KSTGGKAPR	_KS(ad)TGGK(ac)APR_	K7EP01;Q16695;P68431;Q6NXT2;Q5TEC6;P84243;K7EMV3;B4DEB1;Q71DI3	K7EP01;Q16695;P68431;Q5TEC6;P84243;Q71DI3	Q71DI3	Histone H3.1t;Histone H3.1;Histone H3.3C;Histone H3;Histone H3.3;Histone H3.2	0min	495.536	3	495.536	1483.59	-0.069457	-3.4419e-05	-0.41202	-0.00020417	0.00088888	58.699	0.021918	0.020411	23486000	23101000	385460
KSTGGKAPR	_K(me)S(ad)TGGK(ac)APR_	K7EP01;Q16695;P68431;Q6NXT2;Q5TEC6;P84243;K7EMV3;B4DEB1;Q71DI3	K7EP01;Q16695;P68431;Q5TEC6;P84243;Q71DI3	Q71DI3	Histone H3.1t;Histone H3.1;Histone H3.3C;Histone H3;Histone H3.3;Histone H3.2	0min	749.808	2	749.808	1497.6	-0.012583	-9.4349e-06	NA	NA	0.00025199	77.533	NA	NA	23095000	22461000	634640
KSTGGKAPR	_K(me)S(ad)TGGK(ac)APR_	K7EP01;Q16695;P68431;Q6NXT2;Q5TEC6;P84243;K7EMV3;B4DEB1;Q71DI3	K7EP01;Q16695;P68431;Q5TEC6;P84243;Q71DI3	Q71DI3	Histone H3.1t;Histone H3.1;Histone H3.3C;Histone H3;Histone H3.3;Histone H3.2	0min	749.808	2	749.808	1497.6	0.18357	0.00013765	NA	NA	0.00033806	70.028	0.02244	0.02114	18004000	17657000	347080
PDPAKSAPAPKKGSK	_PDPAKS(ad)APAPKKGSK_	Q93079;Q5QNW6;Q5QNW6-2	Q93079;Q5QNW6	Q93079	Histone H2B type 1-H;Histone H2B type 2-F	0min	674.302	3	673.969	2018.89	NA	NA	NA	NA	7.8565e-07	65.374	NA	NA	NA	NA	NA
PDPAKSAPAPKKGSK	_PDPAKS(ad)APAPKKGSK_	Q93079;Q5QNW6;Q5QNW6-2	Q93079;Q5QNW6	Q93079	Histone H2B type 1-H;Histone H2B type 2-F	0min	674.303	3	673.969	2018.89	-0.22747	-0.00015331	NA	NA	0.00077663	53.168	NA	NA	10010000	10010000	0
PEPAKSAPAPK	_PEPAKS(ad)APAPK_	B2R4S9;P62807;Q16778;O60814;P57053	B2R4S9;Q16778;O60814;P57053	B2R4S9	Histone H2B;Histone H2B type 1-C/E/F/G/I;Histone H2B type 2-E;Histone H2B type 1-K;Histone H2B type F-S	0min	545.227	3	545.227	1632.66	0.015212	8.2939e-06	-0.16732	-9.1227e-05	7.0727e-06	77.338	0.05013	0.053985	82806000	79006000	3800500
PEPAKSAPAPK	_PEPAKS(ad)APAPK_	B2R4S9;P62807;Q16778;O60814;P57053	B2R4S9;Q16778;O60814;P57053	B2R4S9	Histone H2B;Histone H2B type 1-C/E/F/G/I;Histone H2B type 2-E;Histone H2B type 1-K;Histone H2B type F-S	0min	817.838	2	817.337	1632.66	0.14078	0.00011507	NA	NA	0.00034186	80.361	0.032649	0.035321	96750000	94411000	2338900
PEPAKSAPAPK	_PEPAKS(ad)APAPK_	B2R4S9;P62807;Q16778;O60814;P57053	B2R4S9;Q16778;O60814;P57053	B2R4S9	Histone H2B;Histone H2B type 1-C/E/F/G/I;Histone H2B type 2-E;Histone H2B type 1-K;Histone H2B type F-S	0min	817.838	2	817.337	1632.66	0.025231	2.0622e-05	-0.33645	-0.00027499	0.00025107	59.198	0.027238	0.027228	47254000	45535000	1719200
PEPAKSAPAPK	_PEPAKS(ad)APAPK_	B2R4S9;P62807;Q16778;O60814;P57053	B2R4S9;Q16778;O60814;P57053	B2R4S9	Histone H2B;Histone H2B type 1-C/E/F/G/I;Histone H2B type 2-E;Histone H2B type 1-K;Histone H2B type F-S	0min	545.226	3	545.227	1632.66	-0.25285	-0.00013786	-0.4194	-0.00022867	3.9289e-05	64.21	0.027535	0.027816	60326000	58195000	2130800
PEPAKSAPAPKKGSK	_PEPAKS(ad)APAPKKGSK_	B2R4S9;P62807;Q16778;O60814;P57053	B2R4S9;Q16778;O60814;P57053	B2R4S9	Histone H2B;Histone H2B type 1-C/E/F/G/I;Histone H2B type 2-E;Histone H2B type 1-K;Histone H2B type F-S	0min	509.483	4	509.233	2032.9	-0.21529	-0.00010964	NA	NA	0.00027562	69.133	0.062959	0.068105	92399000	83517000	8882400
PEPAKSAPAPKKGSK	_PEPAKS(ad)APAPKKGSK_	B2R4S9;P62807;Q16778;O60814;P57053	B2R4S9;Q16778;O60814;P57053	B2R4S9	Histone H2B;Histone H2B type 1-C/E/F/G/I;Histone H2B type 2-E;Histone H2B type 1-K;Histone H2B type F-S	0min	678.641	3	678.641	2032.9	-0.12456	-8.4534e-05	NA	NA	1.9279e-05	83.614	0.049931	0.053979	90903000	88312000	2590900
PEPAKSAPAPKKGSK	_PEPAKS(ad)APAPKKGSK_	B2R4S9;P62807;Q16778;O60814;P57053	B2R4S9;Q16778;O60814;P57053	B2R4S9	Histone H2B;Histone H2B type 1-C/E/F/G/I;Histone H2B type 2-E;Histone H2B type 1-K;Histone H2B type F-S	0min	509.483	4	509.233	2032.9	-0.35017	-0.00017832	-0.68342	-0.00034802	1.0026e-08	78.326	0.032516	0.03297	76293000	73172000	3120600
PEPAKSAPAPKKGSK	_PEPAKS(ad)APAPKKGSK_	B2R4S9;P62807;Q16778;O60814;P57053	B2R4S9;Q16778;O60814;P57053	B2R4S9	Histone H2B;Histone H2B type 1-C/E/F/G/I;Histone H2B type 2-E;Histone H2B type 1-K;Histone H2B type F-S	0min	678.975	3	678.641	2032.9	-0.14673	-9.9574e-05	NA	NA	0.00010252	76.535	0.043605	0.044184	71602000	68663000	2939000
PEPAKSAPAPKKGSK	_PEPAKS(ad)APAPKK(ac)GSK_	B2R4S9;P62807;Q16778;O60814;P57053	B2R4S9;Q16778;O60814;P57053	B2R4S9	Histone H2B;Histone H2B type 1-C/E/F/G/I;Histone H2B type 2-E;Histone H2B type 1-K;Histone H2B type F-S	0min	692.978	3	692.645	2074.91	0.51194	0.00035459	NA	NA	5.0197e-05	78.708	NA	NA	19189000	18932000	256940
PEPAKSAPAPKKGSK	_PEPAKS(ad)APAPKK(ac)GSK_	B2R4S9;P62807;Q16778;O60814;P57053	B2R4S9;Q16778;O60814;P57053	B2R4S9	Histone H2B;Histone H2B type 1-C/E/F/G/I;Histone H2B type 2-E;Histone H2B type 1-K;Histone H2B type F-S	0min	692.979	3	692.645	2074.91	-0.067633	-4.6846e-05	NA	NA	0.00040908	63.682	NA	NA	11190000	11063000	127130
PEPAKSAPAPKKGSKK	_PEPAKS(ad)APAPKKGSKK_	B2R4S9;P62807;Q16778;O60814;P57053	B2R4S9;Q16778;O60814;P57053	B2R4S9	Histone H2B;Histone H2B type 1-C/E/F/G/I;Histone H2B type 2-E;Histone H2B type 1-K;Histone H2B type F-S	0min	541.256	4	541.257	2161	-0.024903	-1.3479e-05	NA	NA	7.8952e-05	73.279	NA	NA	29686000	28327000	1358500
PEPAKSAPAPKKGSKK	_PEPAKS(ad)APAPKKGSKK_	B2R4S9;P62807;Q16778;O60814;P57053	B2R4S9;Q16778;O60814;P57053	B2R4S9	Histone H2B;Histone H2B type 1-C/E/F/G/I;Histone H2B type 2-E;Histone H2B type 1-K;Histone H2B type F-S	0min	721.34	3	721.34	2161	NA	NA	NA	NA	0.00019336	53.554	NA	NA	NA	NA	NA
PEPAKSAPAPKKGSKK	_PEPAKS(ad)APAPKKGSKK_	B2R4S9;P62807;Q16778;O60814;P57053	B2R4S9;Q16778;O60814;P57053	B2R4S9	Histone H2B;Histone H2B type 1-C/E/F/G/I;Histone H2B type 2-E;Histone H2B type 1-K;Histone H2B type F-S	0min	541.507	4	541.257	2161	-0.2756	-0.00014917	-0.43229	-0.00023398	8.5981e-05	53.255	0.043967	0.04541	18208000	17178000	1029700
PEPAKSAPAPKKGSKKAVTK	_PEPAKS(ad)APAPKKGSKKAVTK_	B2R4S9;P62807;Q16778;O60814;P57053	B2R4S9;Q16778;O60814;P57053	B2R4S9	Histone H2B;Histone H2B type 1-C/E/F/G/I;Histone H2B type 2-E;Histone H2B type 1-K;Histone H2B type F-S	0min	641.319	4	641.069	2560.25	-0.19915	-0.00012767	NA	NA	1.5022e-08	82.609	NA	NA	12366000	12301000	64852
PEPAKSAPAPKKGSKKAVTK	_PEPAKS(ad)APAPKKGSKKAVTK_	B2R4S9;P62807;Q16778;O60814;P57053	B2R4S9;Q16778;O60814;P57053	B2R4S9	Histone H2B;Histone H2B type 1-C/E/F/G/I;Histone H2B type 2-E;Histone H2B type 1-K;Histone H2B type F-S	0min	513.256	5	513.056	2560.25	-1.0197	-0.00052318	NA	NA	3.9679e-05	66.536	0.1083	0.11659	18354000	16532000	1821900
PEPAKSAPAPKKGSKKAVTK	_PEPAKS(ad)APAPKKGSKKAVTK_	B2R4S9;P62807;Q16778;O60814;P57053	B2R4S9;Q16778;O60814;P57053	B2R4S9	Histone H2B;Histone H2B type 1-C/E/F/G/I;Histone H2B type 2-E;Histone H2B type 1-K;Histone H2B type F-S	0min	641.319	4	641.069	2560.25	0.2926	0.00018758	NA	NA	0.00057956	52.465	NA	NA	12287000	12101000	185800
PEPAKSAPAPKKGSKKAVTK	_PEPAKS(ad)APAPKKGSKKAVTK_	B2R4S9;P62807;Q16778;O60814;P57053	B2R4S9;Q16778;O60814;P57053	B2R4S9	Histone H2B;Histone H2B type 1-C/E/F/G/I;Histone H2B type 2-E;Histone H2B type 1-K;Histone H2B type F-S	0min	513.256	5	513.056	2560.25	-1.4701	-0.00075423	NA	NA	0.00016148	62.303	0.051361	0.052511	16219000	15315000	904060
PEPAKSAPAPKKGSKKAVTKAQKK	_PEPAKS(ad)APAPKKGSKKAVTKAQKK_	B2R4S9;P62807;Q16778;O60814;P57053	B2R4S9;Q16778;O60814;P57053	B2R4S9	Histone H2B;Histone H2B type 1-C/E/F/G/I;Histone H2B type 2-E;Histone H2B type 1-K;Histone H2B type F-S	0min	604.314	5	604.113	3015.53	0.25185	0.00015215	NA	NA	2.0283e-09	85.062	NA	NA	11653000	11113000	539900
PEPSKSAPAPK	_PEPS(ad)K(me)SAPAPK_	U3KQK0;Q99877;P33778	U3KQK0;P33778	U3KQK0	Histone H2B;Histone H2B type 1-N;Histone H2B type 1-B	0min	555.23	3	555.23	1662.67	-0.19974	-0.0001109	NA	NA	0.00064159	68.536	NA	NA	19848000	19231000	616980
PEPSKSAPAPK	_PEPS(ad)K(me)SAPAPK_	U3KQK0;Q99877;P33778	U3KQK0;P33778	U3KQK0	Histone H2B;Histone H2B type 1-N;Histone H2B type 1-B	0min	555.23	3	555.23	1662.67	-0.12348	-6.8559e-05	NA	NA	0.00057447	70.889	0.024549	0.025099	15670000	15311000	359580
PEPSKSAPAPKKGSK	_PEPS(ad)KSAPAPKKGSK_	U3KQK0;Q99877;P33778	U3KQK0;P33778	U3KQK0	Histone H2B;Histone H2B type 1-N;Histone H2B type 1-B	0min	684.307	3	683.973	2048.9	-0.48294	-0.00033032	NA	NA	0.00084081	52.527	NA	NA	3510800	3510800	0
SAPATGGVKKPHR	_S(ad)APATGGVK(me)K(me)PHR_	Q16695;P68431;Q5TEC6;Q71DI3	Q16695;P68431;Q5TEC6;Q71DI3	Q71DI3	Histone H3.1t;Histone H3.1;Histone H3;Histone H3.2	0min	625.949	3	625.615	1873.82	0.20376	0.00012748	NA	NA	0.00074815	67.997	NA	NA	7973500	7973500	0
SAPATGGVKKPHR	_S(ad)APATGGVK(me)K(me)PHR_	Q16695;P68431;Q5TEC6;Q71DI3	Q16695;P68431;Q5TEC6;Q71DI3	Q71DI3	Histone H3.1t;Histone H3.1;Histone H3;Histone H3.2	0min	469.965	4	469.463	1873.82	0.057011	2.6765e-05	NA	NA	5.3359e-05	86.803	0.071087	0.067077	38680000	35647000	3032700
SAPATGGVKKPHR	_S(ad)APATGGVK(me)K(me)PHR_	Q16695;P68431;Q5TEC6;Q71DI3	Q16695;P68431;Q5TEC6;Q71DI3	Q71DI3	Histone H3.1t;Histone H3.1;Histone H3;Histone H3.2	0min	469.463	4	469.463	1873.82	0.14638	6.8719e-05	-0.29269	-0.00013741	7.0257e-10	85.536	0.097205	0.090718	31527000	28245000	3282500
SAPATGGVKKPHR	_S(ad)APATGGVK(me)K(me)PHR_	Q16695;P68431;Q5TEC6;Q71DI3	Q16695;P68431;Q5TEC6;Q71DI3	Q71DI3	Histone H3.1t;Histone H3.1;Histone H3;Histone H3.2	0min	630.958	3	625.615	1873.82	0.17845	0.00011164	-0.35972	-0.00022505	1.0386e-08	75.088	0.068789	0.065054	58739000	54896000	3843500
SAPATGGVKKPHR	_S(ad)APATGGVK(me)KPHR_	Q16695;P68431;Q5TEC6;Q71DI3	Q16695;P68431;Q5TEC6;Q71DI3	Q71DI3	Histone H3.1t;Histone H3.1;Histone H3;Histone H3.2	0min	620.943	3	620.943	1859.81	-0.061497	-3.8186e-05	NA	NA	3.977e-05	88.101	0.64351	0.60786	38215000	21969000	16246000
SAPATGGVKKPHR	_S(ad)APATGGVK(me)KPHR_	Q16695;P68431;Q5TEC6;Q71DI3	Q16695;P68431;Q5TEC6;Q71DI3	Q71DI3	Histone H3.1t;Histone H3.1;Histone H3;Histone H3.2	0min	465.958	4	465.959	1859.81	-0.031715	-1.4778e-05	NA	NA	2.6179e-07	98.942	0.61963	0.57259	22438000	13470000	8968800
SAPATGGVKKPHR	_S(ad)APATGGVK(me)KPHR_	Q16695;P68431;Q5TEC6;Q71DI3	Q16695;P68431;Q5TEC6;Q71DI3	Q71DI3	Histone H3.1t;Histone H3.1;Histone H3;Histone H3.2	0min	620.943	3	620.943	1859.81	0.5817	0.0003612	NA	NA	0.00015862	79.089	0.65468	0.61089	29408000	16824000	12585000
SAPATGGVKKPHR	_S(ad)APATGGVK(me)KPHR_	Q16695;P68431;Q5TEC6;Q71DI3	Q16695;P68431;Q5TEC6;Q71DI3	Q71DI3	Histone H3.1t;Histone H3.1;Histone H3;Histone H3.2	0min	465.959	4	465.959	1859.81	0.27456	0.00012793	NA	NA	7.9127e-07	91.62	0.51025	0.47572	16096000	9893500	6203000
SGRGKGGKGLGKGGAKR	_(ac)S(ad)GRGKGGKGLGKGGAKR_	P62805	P62805	P62805	Histone H4	0min	539.255	4	539.255	2152.99	-0.38435	-0.00020726	-0.77152	-0.00041604	2.0769e-07	70.174	0.088058	0.094348	111810000	99151000	12660000
SGRGKGGKGLGKGGAKR	_(ac)S(ad)GRGKGGKGLGKGGAKR_	P62805	P62805	P62805	Histone H4	0min	539.505	4	539.255	2152.99	0.11767	6.3454e-05	-0.19699	-0.00010623	5.2566e-07	63.869	0.066802	0.067861	92940000	85998000	6942100
SGRGKGGKGLGKGGAKR	_(ac)S(ad)GRGKGGKGLGKGGAK(ac)R_	P62805	P62805	P62805	Histone H4	0min	733.007	3	732.674	2195	-0.45822	-0.00033573	NA	NA	0.00090473	73.833	NA	NA	62284000	60553000	1731900
SGRGKGGKGLGKGGAKR	_(ac)S(ad)GRGKGGKGLGKGGAK(ac)R_	P62805	P62805	P62805	Histone H4	0min	550.008	4	549.757	2195	0.073678	4.0505e-05	-0.28177	-0.0001549	4.597e-05	70.994	0.022831	0.023045	57415000	54801000	2613300
SGRGKGGKGLGKGGAKR	_(ac)S(ad)GRGKGGKGLGKGGAK(ac)R_	P62805	P62805	P62805	Histone H4	0min	733.008	3	732.674	2195	0.078274	5.7349e-05	NA	NA	2.4531e-05	79.837	0.067816	0.067755	47016000	44639000	2377000
STGGKAPR	_S(ad)TGGK(ac)APR_	K7EP01;Q16695;P68431;Q6NXT2;Q5TEC6;P84243;K7EMV3;B4DEB1;Q71DI3	K7EP01;Q16695;P68431;Q5TEC6;P84243;Q71DI3	Q71DI3	Histone H3.1t;Histone H3.1;Histone H3.3C;Histone H3;Histone H3.3;Histone H3.2	0min	678.752	2	678.753	1355.49	0.17908	0.00012155	NA	NA	0.00091826	76.221	NA	NA	7208500	6907500	300940
STGGKAPR	_S(ad)TGGK(ac)APR_	K7EP01;Q16695;P68431;Q6NXT2;Q5TEC6;P84243;K7EMV3;B4DEB1;Q71DI3	K7EP01;Q16695;P68431;Q5TEC6;P84243;Q71DI3	Q71DI3	Histone H3.1t;Histone H3.1;Histone H3.3C;Histone H3;Histone H3.3;Histone H3.2	0min	678.752	2	678.753	1355.49	-0.13083	-8.8798e-05	NA	NA	0.00024185	96.311	NA	NA	56305000	55253000	1052300
STGGKAPR	_S(ad)TGGK(ac)APR_	K7EP01;Q16695;P68431;Q6NXT2;Q5TEC6;P84243;K7EMV3;B4DEB1;Q71DI3	K7EP01;Q16695;P68431;Q5TEC6;P84243;Q71DI3	Q71DI3	Histone H3.1t;Histone H3.1;Histone H3.3C;Histone H3;Histone H3.3;Histone H3.2	0min	678.752	2	678.753	1355.49	0.04439	3.013e-05	-0.46329	-0.00031446	0.00071865	66.692	0.015587	0.014596	36168000	35393000	775410
STGGKAPRKQLATKAAR	_S(ad)TGGK(ac)APRKQLATK(ac)AAR_	K7EP01;P68431;Q6NXT2;Q5TEC6;P84243;K7EMV3;B4DEB1;Q71DI3	K7EP01;P68431;Q5TEC6;P84243;Q71DI3	Q71DI3	Histone H3.1;Histone H3.3C;Histone H3;Histone H3.3;Histone H3.2	0min	789.371	3	789.372	2365.09	NA	NA	NA	NA	0.00019081	45.618	NA	NA	NA	NA	NA

## Sheet: 10 min
Sequence	Modified.sequence	Proteins	Leading.proteins	Leading.razor.protein	Protein.names	Experiment	MS.MS.m.z	Charge	m.z	Mass	Mass.Error..ppm.	Mass.Error..Da.	Uncalibrated.Mass.Error..ppm.	Uncalibrated.Mass.Error..Da.	PEP	Score	Ratio.H.L	Ratio.H.L.normalized	Intensity	Intensity.L	Intensity.H
AARKSAPATGGVKKPHR	_AARKS(ad)APATGGVK(me)K(me)PHR_	P68431;Q5TEC6;Q71DI3	P68431;Q5TEC6;Q71DI3	Q71DI3	Histone H3.1;Histone H3;Histone H3.2	10min	582.041	4	576.031	2300.09	-0.062931	-3.625e-05	-0.49622	-0.00028584	0.00014991	45.438	1.8816	2.2674	15199000	5603700	9595100
ARTKQTARKSTGGKAPR	_ARTKQTARKS(ad)TGGK(ac)APR_	K7EP01;Q16695;P68431;Q6NXT2;Q5TEC6;P84243;K7EMV3;B4DEB1;Q71DI3	K7EP01;Q16695;P68431;Q5TEC6;P84243;Q71DI3	Q71DI3	Histone H3.1t;Histone H3.1;Histone H3.3C;Histone H3;Histone H3.3;Histone H3.2	10min	606.296	4	600.035	2396.11	-0.11309	-6.7855e-05	-0.63438	-0.00038065	7.106e-06	57.936	0.90441	1.1277	101550000	56473000	45079000
ARTKQTARKSTGGKAPR	_ARTKQTARKS(ad)TGGK(ac)APR_	K7EP01;Q16695;P68431;Q6NXT2;Q5TEC6;P84243;K7EMV3;B4DEB1;Q71DI3	K7EP01;Q16695;P68431;Q5TEC6;P84243;Q71DI3	Q71DI3	Histone H3.1t;Histone H3.1;Histone H3.3C;Histone H3;Histone H3.3;Histone H3.2	10min	606.045	4	600.035	2396.11	0.14895	8.9375e-05	-0.36617	-0.00021971	3.2315e-07	65.954	0.93496	1.1201	82803000	42850000	39952000
KSAPATGGVK	_KS(ad)APATGGVK_	Q16695;P68431;Q5TEC6;Q71DI3	Q16695;P68431;Q5TEC6;Q71DI3	Q71DI3	Histone H3.1t;Histone H3.1;Histone H3;Histone H3.2	10min	736.811	2	728.797	1455.58	0.27584	0.00020103	-0.01366	-9.9552e-06	0.00071347	49.189	1.3113	1.3991	4232500	1574200	2658300
KSAPATGGVKKPHR	_K(me)S(ad)APATGGVK(me)K(me)PHR_	Q16695;P68431;Q5TEC6;Q71DI3	Q16695;P68431;Q5TEC6;Q71DI3	Q71DI3	Histone H3.1t;Histone H3.1;Histone H3;Histone H3.2	10min	505.242	4	504.991	2015.93	-0.17678	-8.9274e-05	-0.41015	-0.00020712	0.00092495	47.037	1.4121	1.5408	19153000	7467600	11686000
KSAPATGGVKKPHR	_K(me)S(ad)APATGGVK(me)K(me)PHR_	Q16695;P68431;Q5TEC6;Q71DI3	Q16695;P68431;Q5TEC6;Q71DI3	Q71DI3	Histone H3.1t;Histone H3.1;Histone H3;Histone H3.2	10min	505.242	4	504.991	2015.93	0.10863	5.4859e-05	-0.22737	-0.00011482	0.00095445	46.797	1.1258	1.23	16657000	7828200	8828800
KSAPATGGVKKPHR	_KS(ad)APATGGVK(me)K(me)PHR_	Q16695;P68431;Q5TEC6;Q71DI3	Q16695;P68431;Q5TEC6;Q71DI3	Q71DI3	Histone H3.1t;Histone H3.1;Histone H3;Histone H3.2	10min	507.748	4	501.487	2001.92	-0.20218	-0.00010139	-0.41219	-0.00020671	0.00067345	40.941	1.3268	1.441	6202700	2848500	3354200
KSTGGKAPR	_KS(ad)TGGK(ac)APR_	K7EP01;Q16695;P68431;Q6NXT2;Q5TEC6;P84243;K7EMV3;B4DEB1;Q71DI3	K7EP01;Q16695;P68431;Q5TEC6;P84243;Q71DI3	Q71DI3	Histone H3.1t;Histone H3.1;Histone H3.3C;Histone H3;Histone H3.3;Histone H3.2	10min	750.815	2	742.8	1483.59	-0.062444	-4.6383e-05	-0.4778	-0.00035491	0.00035269	68.657	0.66709	0.77932	28126000	17418000	10708000
KSTGGKAPR	_KS(ad)TGGK(ac)APR_	K7EP01;Q16695;P68431;Q6NXT2;Q5TEC6;P84243;K7EMV3;B4DEB1;Q71DI3	K7EP01;Q16695;P68431;Q5TEC6;P84243;Q71DI3	Q71DI3	Histone H3.1t;Histone H3.1;Histone H3.3C;Histone H3;Histone H3.3;Histone H3.2	10min	750.814	2	742.8	1483.59	0.21389	0.00015888	-0.13394	-9.949e-05	0.00071552	61.593	0.8271	1.0066	16765000	9920300	6845100
KSTGGKAPR	_KS(ad)TGGK(ac)APR_	K7EP01;Q16695;P68431;Q6NXT2;Q5TEC6;P84243;K7EMV3;B4DEB1;Q71DI3	K7EP01;Q16695;P68431;Q5TEC6;P84243;Q71DI3	Q71DI3	Histone H3.1t;Histone H3.1;Histone H3.3C;Histone H3;Histone H3.3;Histone H3.2	10min	742.8	2	742.8	1483.59	0.21396	0.00015893	-0.0087538	-6.5023e-06	0.00035269	68.657	0.80227	0.86794	35383000	20264000	15119000
KSTGGKAPR	_KS(ad)TGGK(ac)APR_	K7EP01;Q16695;P68431;Q6NXT2;Q5TEC6;P84243;K7EMV3;B4DEB1;Q71DI3	K7EP01;Q16695;P68431;Q5TEC6;P84243;Q71DI3	Q71DI3	Histone H3.1t;Histone H3.1;Histone H3.3C;Histone H3;Histone H3.3;Histone H3.2	10min	495.536	3	495.536	1483.59	0.067687	3.3541e-05	-0.10128	-5.019e-05	0.00088888	58.699	0.84184	0.9072	21554000	11637000	9916300
KSTGGKAPR	_KS(ad)TGGK(ac)APR_	K7EP01;Q16695;P68431;Q6NXT2;Q5TEC6;P84243;K7EMV3;B4DEB1;Q71DI3	K7EP01;Q16695;P68431;Q5TEC6;P84243;Q71DI3	Q71DI3	Histone H3.1t;Histone H3.1;Histone H3.3C;Histone H3;Histone H3.3;Histone H3.2	10min	495.536	3	495.536	1483.59	-0.19014	-9.4223e-05	-0.44847	-0.00022223	0.00018766	69.275	0.77389	0.83915	26738000	14746000	11993000
KSTGGKAPR	_K(me)S(ad)TGGK(ac)APR_	K7EP01;Q16695;P68431;Q6NXT2;Q5TEC6;P84243;K7EMV3;B4DEB1;Q71DI3	K7EP01;Q16695;P68431;Q5TEC6;P84243;Q71DI3	Q71DI3	Histone H3.1t;Histone H3.1;Histone H3.3C;Histone H3;Histone H3.3;Histone H3.2	10min	757.822	2	749.808	1497.6	-0.34667	-0.00025994	-0.55963	-0.00041962	0.00010151	78.556	0.91781	0.9855	30440000	16718000	13722000
KSTGGKAPR	_K(me)S(ad)TGGK(ac)APR_	K7EP01;Q16695;P68431;Q6NXT2;Q5TEC6;P84243;K7EMV3;B4DEB1;Q71DI3	K7EP01;Q16695;P68431;Q5TEC6;P84243;Q71DI3	Q71DI3	Histone H3.1t;Histone H3.1;Histone H3.3C;Histone H3;Histone H3.3;Histone H3.2	10min	505.55	3	500.208	1497.6	-0.36499	-0.00018257	-0.58113	-0.00029069	0.00046002	60.102	0.84793	0.92334	19489000	9557100	9931500
KSTGGKAPRKQLATKAAR	_KS(ad)TGGKAPRKQLATKAAR_	K7EP01;P68431;Q6NXT2;Q5TEC6;P84243;K7EMV3;B4DEB1;Q71DI3	K7EP01;P68431;Q5TEC6;P84243;Q71DI3	Q71DI3	Histone H3.1;Histone H3.3C;Histone H3;Histone H3.3;Histone H3.2	10min	603.55	4	603.299	2409.17	0.040442	2.4398e-05	-0.44356	-0.0002676	1.5546e-05	50.831	0.85569	1.0242	14650000	8100600	6549200
KSTGGKAPRKQLATKAAR	_KS(ad)TGGK(ac)APRK(ac)QLATKAAR_	K7EP01;P68431;Q6NXT2;Q5TEC6;P84243;K7EMV3;B4DEB1;Q71DI3	K7EP01;P68431;Q5TEC6;P84243;Q71DI3	Q71DI3	Histone H3.1;Histone H3.3C;Histone H3;Histone H3.3;Histone H3.2	10min	632.818	4	624.305	2493.19	0.20134	0.0001257	-0.4332	-0.00027045	0.00049023	40.968	0.86712	1.058	25262000	18347000	6915100
PDPAKSAPAPK	_(ac)PDPAKS(ad)APAPK_	Q93079;Q5QNW6;Q5QNW6-2	Q93079;Q5QNW6	Q93079	Histone H2B type 1-H;Histone H2B type 2-F	10min	839.347	2	831.334	1660.65	-0.83871	-0.00069725	NA	NA	0.00025608	81.185	NA	NA	36010000	0	36010000
PDPAKSAPAPKKGSK	_PDPAKS(ad)APAPKKGSK_	Q93079;Q5QNW6;Q5QNW6-2	Q93079;Q5QNW6	Q93079	Histone H2B type 1-H;Histone H2B type 2-F	10min	673.969	3	673.969	2018.89	-0.15879	-0.00010702	NA	NA	0.00016897	73.833	0.35694	0.42077	12869000	8915200	3953700
PDPAKSAPAPKKGSK	_PDPAKS(ad)APAPKKGSK_	Q93079;Q5QNW6;Q5QNW6-2	Q93079;Q5QNW6	Q93079	Histone H2B type 1-H;Histone H2B type 2-F	10min	684.655	3	673.969	2018.89	NA	NA	NA	NA	4.0764e-07	71.031	NA	NA	NA	NA	NA
PELAKSAPAPK	_PELAKS(ad)APAPK_	Q99880	Q99880	Q99880	Histone H2B type 1-L	10min	833.366	2	825.352	1648.69	-0.0062011	-5.1181e-06	-0.26317	-0.00021721	1.6852e-05	70.889	0.89709	1.1146	10527000	4680600	5846200
PELAKSAPAPKKGSK	_PELAKS(ad)APAPKKGSK_	Q99880	Q99880	Q99880	Histone H2B type 1-L	10min	684.321	3	683.985	2048.93	0.4764	0.00032585	0.12747	8.719e-05	1.5327e-05	62.357	0.89284	1.0523	13093000	5991900	7100800
PEPAKSAPAPK	_PEPAKS(ad)APAPK_	B2R4S9;P62807;Q16778;O60814;P57053	B2R4S9;Q16778;O60814;P57053	B2R4S9	Histone H2B;Histone H2B type 1-C/E/F/G/I;Histone H2B type 2-E;Histone H2B type 1-K;Histone H2B type F-S	10min	825.351	2	817.337	1632.66	0.16837	0.00013761	-0.33502	-0.00027382	3.4894e-06	90.131	0.86756	1.0669	251860000	137600000	114260000
PEPAKSAPAPK	_PEPAKS(ad)APAPK_	B2R4S9;P62807;Q16778;O60814;P57053	B2R4S9;Q16778;O60814;P57053	B2R4S9	Histone H2B;Histone H2B type 1-C/E/F/G/I;Histone H2B type 2-E;Histone H2B type 1-K;Histone H2B type F-S	10min	550.57	3	545.227	1632.66	-0.04841	-2.6395e-05	-0.45764	-0.00024952	7.5098e-06	75.01	0.77531	0.95437	221420000	119890000	101530000
PEPAKSAPAPK	_PEPAKS(ad)APAPK_	B2R4S9;P62807;Q16778;O60814;P57053	B2R4S9;Q16778;O60814;P57053	B2R4S9	Histone H2B;Histone H2B type 1-C/E/F/G/I;Histone H2B type 2-E;Histone H2B type 1-K;Histone H2B type F-S	10min	817.337	2	817.337	1632.66	0.0078595	6.4238e-06	-0.39087	-0.00031947	6.0759e-06	79.89	0.77945	0.92095	131110000	72906000	58202000
PEPAKSAPAPK	_PEPAKS(ad)APAPK_	B2R4S9;P62807;Q16778;O60814;P57053	B2R4S9;Q16778;O60814;P57053	B2R4S9	Histone H2B;Histone H2B type 1-C/E/F/G/I;Histone H2B type 2-E;Histone H2B type 1-K;Histone H2B type F-S	10min	545.226	3	545.227	1632.66	0.078053	4.2556e-05	-0.38022	-0.00020731	0.00017064	60.529	0.81082	0.96736	160500000	86650000	73852000
PEPAKSAPAPKKGSK	_PEPAKS(ad)APAPKKGSK_	B2R4S9;P62807;Q16778;O60814;P57053	B2R4S9;Q16778;O60814;P57053	B2R4S9	Histone H2B;Histone H2B type 1-C/E/F/G/I;Histone H2B type 2-E;Histone H2B type 1-K;Histone H2B type F-S	10min	517.246	4	509.233	2032.9	-0.1413	-7.1953e-05	-0.76458	-0.00038935	4.153e-13	88.768	0.76498	0.95544	168400000	92888000	75509000
PEPAKSAPAPKKGSK	_PEPAKS(ad)APAPKKGSK_	B2R4S9;P62807;Q16778;O60814;P57053	B2R4S9;Q16778;O60814;P57053	B2R4S9	Histone H2B;Histone H2B type 1-C/E/F/G/I;Histone H2B type 2-E;Histone H2B type 1-K;Histone H2B type F-S	10min	689.661	3	678.641	2032.9	-0.25598	-0.00017372	-0.76003	-0.00051579	5.5047e-10	86.136	0.73235	0.90107	235410000	142970000	92449000
PEPAKSAPAPKKGSK	_PEPAKS(ad)APAPKKGSK_	B2R4S9;P62807;Q16778;O60814;P57053	B2R4S9;Q16778;O60814;P57053	B2R4S9	Histone H2B;Histone H2B type 1-C/E/F/G/I;Histone H2B type 2-E;Histone H2B type 1-K;Histone H2B type F-S	10min	1017.96	2	1017.46	2032.9	-0.66958	-0.00068127	-1.441	-0.0014661	8.7371e-05	53.168	0.81137	0.98778	51078000	20212000	30867000
PEPAKSAPAPKKGSK	_PEPAKSAPAPKKGS(ad)K_	B2R4S9;P62807;Q16778;O60814;P57053	B2R4S9;Q16778;O60814;P57053	B2R4S9	Histone H2B;Histone H2B type 1-C/E/F/G/I;Histone H2B type 2-E;Histone H2B type 1-K;Histone H2B type F-S	10min	689.327	3	678.641	2032.9	-0.217	-0.00014726	-0.57946	-0.00039325	8.8293e-06	67.418	0.75	0.89558	163090000	93807000	69279000
PEPAKSAPAPKKGSK	_PEPAKS(ad)APAPKKGSK_	B2R4S9;P62807;Q16778;O60814;P57053	B2R4S9;Q16778;O60814;P57053	B2R4S9	Histone H2B;Histone H2B type 1-C/E/F/G/I;Histone H2B type 2-E;Histone H2B type 1-K;Histone H2B type F-S	10min	517.247	4	509.233	2032.9	-0.19483	-9.9215e-05	-0.71164	-0.00036239	1.0797e-06	72.793	0.82034	0.97465	148570000	78258000	70316000
PEPAKSAPAPKKGSK	_PEPAKS(ad)APAPKK(ac)GSK_	B2R4S9;P62807;Q16778;O60814;P57053	B2R4S9;Q16778;O60814;P57053	B2R4S9	Histone H2B;Histone H2B type 1-C/E/F/G/I;Histone H2B type 2-E;Histone H2B type 1-K;Histone H2B type F-S	10min	703.663	3	692.645	2074.91	-0.15037	-0.00010415	-0.47335	-0.00032786	4.1733e-09	82.609	0.64398	0.73869	35021000	20737000	14283000
PEPAKSAPAPKKGSK	_PEPAKS(ad)APAPKK(ac)GSK_	B2R4S9;P62807;Q16778;O60814;P57053	B2R4S9;Q16778;O60814;P57053	B2R4S9	Histone H2B;Histone H2B type 1-C/E/F/G/I;Histone H2B type 2-E;Histone H2B type 1-K;Histone H2B type F-S	10min	692.979	3	692.645	2074.91	0.088998	6.1644e-05	-0.22701	-0.00015724	2.6434e-19	102.07	0.55086	0.66845	24178000	15166000	9011800
PEPAKSAPAPKKGSKK	_PEPAKS(ad)APAPKKGSKK_	B2R4S9;P62807;Q16778;O60814;P57053	B2R4S9;Q16778;O60814;P57053	B2R4S9	Histone H2B;Histone H2B type 1-C/E/F/G/I;Histone H2B type 2-E;Histone H2B type 1-K;Histone H2B type F-S	10min	721.674	3	721.34	2161	-0.074026	-5.3398e-05	-0.40461	-0.00029186	2.8076e-05	56.339	0.55589	0.63055	36536000	21830000	14706000
PEPAKSAPAPKKGSKK	_PEPAKS(ad)APAPKKGSKK_	B2R4S9;P62807;Q16778;O60814;P57053	B2R4S9;Q16778;O60814;P57053	B2R4S9	Histone H2B;Histone H2B type 1-C/E/F/G/I;Histone H2B type 2-E;Histone H2B type 1-K;Histone H2B type F-S	10min	551.274	4	541.257	2161	0.1963	0.00010625	-0.29289	-0.00015853	4.3636e-06	62.525	0.79877	0.94153	46909000	24669000	22240000
PEPAKSAPAPKKGSKK	_PEPAKS(ad)APAPKKGSKK_	B2R4S9;P62807;Q16778;O60814;P57053	B2R4S9;Q16778;O60814;P57053	B2R4S9	Histone H2B;Histone H2B type 1-C/E/F/G/I;Histone H2B type 2-E;Histone H2B type 1-K;Histone H2B type F-S	10min	551.274	4	541.257	2161	-0.17668	-9.5628e-05	-0.54413	-0.00029452	1.8287e-06	69.361	0.73602	0.91239	44799000	25131000	19668000
PEPAKSAPAPKKGSKK	_PEPAKS(ad)APAPKKGSKK_	B2R4S9;P62807;Q16778;O60814;P57053	B2R4S9;Q16778;O60814;P57053	B2R4S9	Histone H2B;Histone H2B type 1-C/E/F/G/I;Histone H2B type 2-E;Histone H2B type 1-K;Histone H2B type F-S	10min	721.339	3	721.34	2161	-0.071619	-5.1662e-05	-0.39425	-0.00028439	5.257e-07	71.376	0.78334	0.92499	13301000	7384800	5916000
PEPAKSAPAPKKGSKK	_PEPAKS(ad)APAPKKGSK(ac)K_	B2R4S9;P62807;Q16778;O60814;P57053	B2R4S9;Q16778;O60814;P57053	B2R4S9	Histone H2B;Histone H2B type 1-C/E/F/G/I;Histone H2B type 2-E;Histone H2B type 1-K;Histone H2B type F-S	10min	735.678	3	735.343	2203.01	0.45121	0.0003318	0.2495	0.00018347	3.8643e-05	52.862	0.43717	0.49185	4292000	3060700	1231300
PEPAKSAPAPKKGSKKAVTK	_PEPAKS(ad)APAPKKGSKKAVTK_	B2R4S9;P62807;Q16778;O60814;P57053	B2R4S9;Q16778;O60814;P57053	B2R4S9	Histone H2B;Histone H2B type 1-C/E/F/G/I;Histone H2B type 2-E;Histone H2B type 1-K;Histone H2B type F-S	10min	641.321	4	641.069	2560.25	0.18018	0.00011551	0.079659	5.1067e-05	2.0931e-06	56.719	0.65639	0.78957	20302000	10546000	9755600
PEPAKSAPAPKKGSKKAVTK	_PEPAKS(ad)APAPKKGSKKAVTK_	B2R4S9;P62807;Q16778;O60814;P57053	B2R4S9;Q16778;O60814;P57053	B2R4S9	Histone H2B;Histone H2B type 1-C/E/F/G/I;Histone H2B type 2-E;Histone H2B type 1-K;Histone H2B type F-S	10min	653.34	4	641.069	2560.25	0.37686	0.00024159	0.048161	3.0874e-05	3.6276e-06	52.72	0.73124	0.88787	19143000	10040000	9103100
PEPAKSAPAPKKGSKKAVTK	_PEPAKS(ad)APAPKKGSKKAVTK_	B2R4S9;P62807;Q16778;O60814;P57053	B2R4S9;Q16778;O60814;P57053	B2R4S9	Histone H2B;Histone H2B type 1-C/E/F/G/I;Histone H2B type 2-E;Histone H2B type 1-K;Histone H2B type F-S	10min	513.256	5	513.056	2560.25	-0.23349	-0.0001198	-0.60668	-0.00031126	5.7788e-09	63.869	0.76306	0.95186	29042000	15855000	13186000
PEPAKSAPAPKKGSKKAVTKAQKK	_PEPAKS(ad)APAPKKGSKKAVTKAQKK_	B2R4S9;P62807;Q16778;O60814;P57053	B2R4S9;Q16778;O60814;P57053	B2R4S9	Histone H2B;Histone H2B type 1-C/E/F/G/I;Histone H2B type 2-E;Histone H2B type 1-K;Histone H2B type F-S	10min	616.936	5	604.113	3015.53	-0.11135	-6.7271e-05	-0.68244	-0.00041227	3.7111e-06	48.077	0.42351	0.52223	14016000	7972200	6043800
PEPAKSAPAPKKGSKKAVTKAQKK	_PEPAKS(ad)APAPKKGSKKAVTKAQKK_	B2R4S9;P62807;Q16778;O60814;P57053	B2R4S9;Q16778;O60814;P57053	B2R4S9	Histone H2B;Histone H2B type 1-C/E/F/G/I;Histone H2B type 2-E;Histone H2B type 1-K;Histone H2B type F-S	10min	604.514	5	604.113	3015.53	0.23296	0.00014074	-0.38683	-0.00023369	1.8318e-10	62.082	0.64073	0.80586	8608300	5310800	3297600
PEPSKSAPAPK	_PEPS(ad)K(me)SAPAPK_	U3KQK0;Q99877;P33778	U3KQK0;P33778	U3KQK0	Histone H2B;Histone H2B type 1-N;Histone H2B type 1-B	10min	560.573	3	555.23	1662.67	-0.22189	-0.0001232	-0.61707	-0.00034262	1.2299e-05	71.513	0.64012	0.78033	54421000	31912000	22509000
PEPSKSAPAPK	_PEPS(ad)K(me)SAPAPK_	U3KQK0;Q99877;P33778	U3KQK0;P33778	U3KQK0	Histone H2B;Histone H2B type 1-N;Histone H2B type 1-B	10min	832.842	2	832.342	1662.67	-0.15139	-0.00012601	-0.70375	-0.00058576	5.1929e-06	76.759	0.69189	0.83276	48903000	26076000	22827000
PEPSKSAPAPK	_PEPS(ad)K(me)SAPAPK_	U3KQK0;Q99877;P33778	U3KQK0;P33778	U3KQK0	Histone H2B;Histone H2B type 1-N;Histone H2B type 1-B	10min	555.564	3	555.23	1662.67	-0.051825	-2.8775e-05	-0.63347	-0.00035172	2.208e-05	67.385	0.67005	0.83552	36621000	21830000	14791000
PEPSKSAPAPKKGSK	_PEPS(ad)KSAPAPKKGSK_	U3KQK0;Q99877;P33778	U3KQK0;P33778	U3KQK0	Histone H2B;Histone H2B type 1-N;Histone H2B type 1-B	10min	683.973	3	683.973	2048.9	-0.15067	-0.00010305	-0.30082	-0.00020575	4.8232e-05	60.764	0.4971	0.62621	8715700	4392600	4323100
PEPSKSAPAPKKGSK	_PEPS(ad)K(me)SAPAPKKGSK_	U3KQK0;Q99877;P33778	U3KQK0;P33778	U3KQK0	Histone H2B;Histone H2B type 1-N;Histone H2B type 1-B	10min	524.749	4	516.735	2062.91	-0.13728	-7.0939e-05	-0.75082	-0.00038798	7.003e-05	57.703	0.71457	0.85813	57900000	30561000	27338000
PEPSKSAPAPKKGSK	_PEPS(ad)K(me)SAPAPKKGSK_	U3KQK0;Q99877;P33778	U3KQK0;P33778	U3KQK0	Histone H2B;Histone H2B type 1-N;Histone H2B type 1-B	10min	699.331	3	688.645	2062.91	0.15801	0.00010881	-0.30232	-0.00020819	6.713e-06	65.374	0.62224	0.76974	53652000	32356000	21296000
PEPSKSAPAPKKGSK	_PEPS(ad)K(me)SAPAPKKGSK_	U3KQK0;Q99877;P33778	U3KQK0;P33778	U3KQK0	Histone H2B;Histone H2B type 1-N;Histone H2B type 1-B	10min	524.749	4	516.735	2062.91	-0.15454	-7.9855e-05	-0.90719	-0.00046878	0.00031962	46.892	0.72028	0.8957	40908000	24319000	16588000
PEPSKSAPAPKKGSK	_PEPS(ad)K(me)SAPAPKK(ac)GSK_	U3KQK0;Q99877;P33778	U3KQK0;P33778	U3KQK0	Histone H2B;Histone H2B type 1-N;Histone H2B type 1-B	10min	702.981	3	702.648	2104.92	-0.77228	-0.00054264	-1.0815	-0.00075995	0.00019897	55.755	0.42699	0.52298	7522900	4804400	2718500
PEPSKSAPAPKKGSK	_PEPS(ad)K(me)SAPAPK(ac)KGSK_	U3KQK0;Q99877;P33778	U3KQK0;P33778	U3KQK0	Histone H2B;Histone H2B type 1-N;Histone H2B type 1-B	10min	702.982	3	702.648	2104.92	0.12805	8.9975e-05	-0.34063	-0.00023934	0.00019446	55.66	0.47779	0.5366	4660100	3003500	1656600
PEPVKSAPVPK	_PEPVKS(ad)APVPK_	Q99879	Q99879	Q99879	Histone H2B type 1-M	10min	853.381	2	845.368	1688.72	0.0030676	2.5933e-06	-0.5966	-0.00050435	2.6559e-06	92.265	0.93606	1.1267	20135000	10057000	10078000
QTARKSTGGKAPR	_QTARKS(ad)TGGK(ac)APR_	K7EP01;Q16695;P68431;Q6NXT2;Q5TEC6;P84243;K7EMV3;B4DEB1;Q71DI3	K7EP01;Q16695;P68431;Q5TEC6;P84243;Q71DI3	Q71DI3	Histone H3.1t;Histone H3.1;Histone H3.3C;Histone H3;Histone H3.3;Histone H3.2	10min	652.96	3	647.617	1939.83	-0.059476	-3.8517e-05	-0.51727	-0.00033499	8.4075e-06	62.162	0.7993	0.94868	65741000	40342000	25399000
QTARKSTGGKAPR	_QTARKS(ad)TGGK(ac)APR_	K7EP01;Q16695;P68431;Q6NXT2;Q5TEC6;P84243;K7EMV3;B4DEB1;Q71DI3	K7EP01;Q16695;P68431;Q5TEC6;P84243;Q71DI3	Q71DI3	Histone H3.1t;Histone H3.1;Histone H3.3C;Histone H3;Histone H3.3;Histone H3.2	10min	647.951	3	647.617	1939.83	0.18776	0.0001216	-0.45071	-0.00029189	0.00019415	53.869	0.79052	0.97536	58070000	33518000	24552000
SAPATGGVKKPHR	_S(ad)APATGGVK(me)K(me)PHR_	Q16695;P68431;Q5TEC6;Q71DI3	Q16695;P68431;Q5TEC6;Q71DI3	Q71DI3	Histone H3.1t;Histone H3.1;Histone H3;Histone H3.2	10min	631.292	3	625.615	1873.82	0.21631	0.00013532	-0.16929	-0.00010591	1.8602e-09	84.365	0.88133	1.0256	32154000	16337000	15817000
SAPATGGVKKPHR	_S(ad)APATGGVK(me)K(me)PHR_	Q16695;P68431;Q5TEC6;Q71DI3	Q16695;P68431;Q5TEC6;Q71DI3	Q71DI3	Histone H3.1t;Histone H3.1;Histone H3;Histone H3.2	10min	473.471	4	469.463	1873.82	-0.24447	-0.00011477	-0.6511	-0.00030567	7.0257e-10	85.536	1.4066	1.7102	17376000	7655800	9719800
SAPATGGVKKPHR	_S(ad)APATGGVK(me)K(me)PHR_	Q16695;P68431;Q5TEC6;Q71DI3	Q16695;P68431;Q5TEC6;Q71DI3	Q71DI3	Histone H3.1t;Histone H3.1;Histone H3;Histone H3.2	10min	625.615	3	625.615	1873.82	0.59642	0.00037313	0.19973	0.00012495	1.7097e-14	107.17	1.1382	1.386	25038000	11636000	13402000
SAPATGGVKKPHR	_S(ad)APATGGVK(me)K(me)PHR_	Q16695;P68431;Q5TEC6;Q71DI3	Q16695;P68431;Q5TEC6;Q71DI3	Q71DI3	Histone H3.1t;Histone H3.1;Histone H3;Histone H3.2	10min	473.972	4	469.463	1873.82	0.15113	7.0949e-05	-0.10602	-4.9775e-05	2.225e-12	92.19	1.3076	1.5651	11767000	4784200	6982900
SAPATGGVKKPHR	_S(ad)APATGGVK(me)K(me)PHR_	Q16695;P68431;Q5TEC6;Q71DI3	Q16695;P68431;Q5TEC6;Q71DI3	Q71DI3	Histone H3.1t;Histone H3.1;Histone H3;Histone H3.2	10min	469.714	4	469.463	1873.82	0.59561	0.00027962	0.30673	0.000144	1.6824e-12	93.766	1.2091	1.3133	19924000	9492000	10432000
SAPATGGVKKPHR	_S(ad)APATGGVK(me)K(me)PHR_	Q16695;P68431;Q5TEC6;Q71DI3	Q16695;P68431;Q5TEC6;Q71DI3	Q71DI3	Histone H3.1t;Histone H3.1;Histone H3;Histone H3.2	10min	625.615	3	625.615	1873.82	0.72047	0.00045073	0.43771	0.00027384	4.9897e-09	80.96	1.1848	1.2791	85534000	39601000	45933000
SAPATGGVKKPHR	_S(ad)APATGGVK(me)K(me)PHR_	Q16695;P68431;Q5TEC6;Q71DI3	Q16695;P68431;Q5TEC6;Q71DI3	Q71DI3	Histone H3.1t;Histone H3.1;Histone H3;Histone H3.2	10min	625.615	3	625.615	1873.82	0.87701	0.00054867	0.26264	0.00016431	3.1676e-12	90.412	1.1601	1.2304	76501000	34627000	41874000
SAPATGGVKKPHR	_S(ad)APATGGVK(me)K(me)PHR_	Q16695;P68431;Q5TEC6;Q71DI3	Q16695;P68431;Q5TEC6;Q71DI3	Q71DI3	Histone H3.1t;Histone H3.1;Histone H3;Histone H3.2	10min	469.463	4	469.463	1873.82	0.63785	0.00029944	0.17045	8.0019e-05	1.0528e-15	110.38	1.1591	1.2538	24481000	10584000	13897000
SAPATGGVKKPHR	_S(ad)APATGGVK(me)KPHR_	Q16695;P68431;Q5TEC6;Q71DI3	Q16695;P68431;Q5TEC6;Q71DI3	Q71DI3	Histone H3.1t;Histone H3.1;Histone H3;Histone H3.2	10min	620.942	3	620.943	1859.81	0.14004	8.6955e-05	NA	NA	9.3991e-05	83.204	1.6341	1.7629	32421000	11874000	20547000
SAPATGGVKKPHR	_S(ad)APATGGVK(me)KPHR_	Q16695;P68431;Q5TEC6;Q71DI3	Q16695;P68431;Q5TEC6;Q71DI3	Q71DI3	Histone H3.1t;Histone H3.1;Histone H3;Histone H3.2	10min	466.21	4	465.959	1859.81	-0.028641	-1.3345e-05	NA	NA	0.0003052	76.357	1.6993	1.7888	9827600	4036300	5791300
SAPATGGVKKPHR	_S(ad)APATGGVKKPHR_	Q16695;P68431;Q5TEC6;Q71DI3	Q16695;P68431;Q5TEC6;Q71DI3	Q71DI3	Histone H3.1t;Histone H3.1;Histone H3;Histone H3.2	10min	621.615	3	616.271	1845.79	NA	NA	NA	NA	8.8322e-07	66.989	NA	NA	NA	NA	NA
SAPATGGVKKPHR	_S(ad)APATGGVKKPHR_	Q16695;P68431;Q5TEC6;Q71DI3	Q16695;P68431;Q5TEC6;Q71DI3	Q71DI3	Histone H3.1t;Histone H3.1;Histone H3;Histone H3.2	10min	616.605	3	616.271	1845.79	NA	NA	NA	NA	7.2251e-07	69.03	NA	NA	NA	NA	NA
SGRGKGGKGLGK	_(ac)S(ad)GRGKGGKGLGK_	P62805	P62805	P62805	Histone H4	10min	562.58	3	562.245	1683.71	-0.035321	-1.9859e-05	-0.58172	-0.00032707	0.00055732	51.466	1.0277	1.2553	85472000	41394000	44078000
SGRGKGGKGLGK	_(ac)S(ad)GRGKGGKGLGK_	P62805	P62805	P62805	Histone H4	10min	570.259	3	562.245	1683.71	0.088762	4.9906e-05	-0.50471	-0.00028377	0.00081677	49.448	1.0675	1.2908	74846000	36384000	38462000
SGRGKGGKGLGKGGAK	_(ac)S(ad)GRGKGGKGLGKGGAK_	P62805	P62805	P62805	Histone H4	10min	677.322	3	666.637	1996.89	0.30009	0.00020005	-0.1296	-8.6393e-05	0.00015162	49.595	1.0414	1.2186	27695000	13136000	14559000
SGRGKGGKGLGKGGAKR	_(ac)S(ad)GRGKGGKGLGKGGAKR_	P62805	P62805	P62805	Histone H4	10min	539.254	4	539.255	2152.99	-0.11744	-6.3332e-05	-0.44277	-0.00023877	2.0026e-14	91.276	1.2985	1.5927	267470000	99998000	167470000
SGRGKGGKGLGKGGAKR	_(ac)S(ad)GRGKGGKGLGKGGAKR_	P62805	P62805	P62805	Histone H4	10min	718.67	3	718.67	2152.99	-0.14292	-0.00010271	-0.3413	-0.00024528	1.8444e-05	61.265	1.0904	1.2921	61165000	29882000	31284000
SGRGKGGKGLGKGGAKR	_(ac)S(ad)GRGKGGKGLGKGGAKR_	P62805	P62805	P62805	Histone H4	10min	547.269	4	539.255	2152.99	-0.11636	-6.2747e-05	-0.5925	-0.00031951	1.7745e-14	92.098	1.2765	1.5495	219230000	91036000	128190000
SGRGKGGKGLGKGGAKR	_(ac)S(ad)GRGKGGKGLGKGGAKR_	P62805	P62805	P62805	Histone H4	10min	719.339	3	718.67	2152.99	0.0026775	1.9242e-06	-0.44398	-0.00031907	9.1735e-05	56.514	1.1419	1.4203	40643000	16618000	24025000
SGRGKGGKGLGKGGAKR	_(ac)S(ad)GRGKGGKGLGKGGAK(ac)R_	P62805	P62805	P62805	Histone H4	10min	549.758	4	549.757	2195	0.15648	8.6027e-05	-0.31753	-0.00017456	8.6353e-06	73.672	0.92852	1.1549	160140000	70351000	89788000
SGRGKGGKGLGKGGAKR	_(ac)S(ad)GRGKGGKGLGKGGAK(ac)R_	P62805	P62805	P62805	Histone H4	10min	733.007	3	732.674	2195	0.23421	0.0001716	-0.091011	-6.6681e-05	1.5425e-08	85.28	0.95166	1.1904	105890000	56791000	49099000
SGRGKGGKGLGKGGAKR	_(ac)S(ad)GRGKGGKGLGKGGAK(ac)R_	P62805	P62805	P62805	Histone H4	10min	550.008	4	549.757	2195	0.11368	6.2496e-05	-0.48841	-0.00026851	5.7762e-18	99.603	0.8749	1.0341	113140000	60079000	53060000
SGRGKGGKGLGKGGAKR	_(ac)S(ad)GRGKGGK(ac)GLGKGGAK(ac)R_	P62805	P62805	P62805	Histone H4	10min	747.011	3	746.677	2237.01	-0.12779	-9.5417e-05	-0.42083	-0.00031423	0.00058098	40.493	0.60182	0.7235	15005000	8560700	6443900
SGRGKQGGKAR	_(ac)S(ad)GRGKQGGKAR_	Q8IUE6;Q96QV6;Q6FI13;Q16777;P20671;Q93077;Q7L7L0	Q8IUE6;Q96QV6;Q6FI13;P20671;Q93077;Q7L7L0	Q6FI13	Histone H2A type 2-B;Histone H2A type 1-A;Histone H2A type 2-A;Histone H2A type 2-C;Histone H2A type 1-D;Histone H2A type 1-C;Histone H2A type 3	10min	562.236	3	562.237	1683.69	NA	NA	NA	NA	0.00024603	62.466	NA	NA	NA	NA	NA
STGGKAPR	_S(ad)TGGKAPR_	K7EP01;Q16695;P68431;Q6NXT2;Q5TEC6;P84243;K7EMV3;B4DEB1;Q71DI3	K7EP01;Q16695;P68431;Q5TEC6;P84243;Q71DI3	Q71DI3	Histone H3.1t;Histone H3.1;Histone H3.3C;Histone H3;Histone H3.3;Histone H3.2	10min	439.079	3	438.834	1313.48	-0.04545	-1.9945e-05	-0.59408	-0.0002607	0.00069955	89.355	1.0751	1.2308	35299000	14431000	20868000
STGGKAPR	_S(ad)TGGK(ac)APR_	K7EP01;Q16695;P68431;Q6NXT2;Q5TEC6;P84243;K7EMV3;B4DEB1;Q71DI3	K7EP01;Q16695;P68431;Q5TEC6;P84243;Q71DI3	Q71DI3	Histone H3.1t;Histone H3.1;Histone H3.3C;Histone H3;Histone H3.3;Histone H3.2	10min	682.759	2	678.753	1355.49	-0.1796	-0.00012191	-0.50628	-0.00034364	0.00068111	86.67	1.3481	1.573	28425000	10317000	18108000
STGGKAPR	_S(ad)TGGK(ac)APR_	K7EP01;Q16695;P68431;Q6NXT2;Q5TEC6;P84243;K7EMV3;B4DEB1;Q71DI3	K7EP01;Q16695;P68431;Q5TEC6;P84243;Q71DI3	Q71DI3	Histone H3.1t;Histone H3.1;Histone H3.3C;Histone H3;Histone H3.3;Histone H3.2	10min	678.753	2	678.753	1355.49	-0.10791	-7.3242e-05	-0.57986	-0.00039358	0.00067687	85.676	0.81831	0.99505	16585000	9610900	6974600
STGGKAPR	_S(ad)TGGK(ac)APR_	K7EP01;Q16695;P68431;Q6NXT2;Q5TEC6;P84243;K7EMV3;B4DEB1;Q71DI3	K7EP01;Q16695;P68431;Q5TEC6;P84243;Q71DI3	Q71DI3	Histone H3.1t;Histone H3.1;Histone H3.3C;Histone H3;Histone H3.3;Histone H3.2	10min	678.752	2	678.753	1355.49	-0.017087	-1.1598e-05	-0.31718	-0.00021528	0.00049443	77.732	0.8464	0.92434	51486000	28297000	23189000
STGGKAPR	_S(ad)TGGK(ac)APR_	K7EP01;Q16695;P68431;Q6NXT2;Q5TEC6;P84243;K7EMV3;B4DEB1;Q71DI3	K7EP01;Q16695;P68431;Q5TEC6;P84243;Q71DI3	Q71DI3	Histone H3.1t;Histone H3.1;Histone H3.3C;Histone H3;Histone H3.3;Histone H3.2	10min	678.753	2	678.753	1355.49	0.12653	8.588e-05	-0.36496	-0.00024772	0.00050347	76.679	0.7764	0.85448	40407000	22770000	17637000
STGGKAPRKQLATK	_S(ad)TGGK(ac)APRKQLATK_	K7EP01;Q16695;P68431;Q6NXT2;Q5TEC6;P84243;K7EMV3;B4DEB1;Q71DI3	K7EP01;Q16695;P68431;Q5TEC6;P84243;Q71DI3	Q71DI3	Histone H3.1t;Histone H3.1;Histone H3.3C;Histone H3;Histone H3.3;Histone H3.2	10min	676.31	3	675.977	2024.91	-0.50766	-0.00034317	-0.8695	-0.00058776	0.00010005	57.288	0.78952	0.98252	10478000	6733400	3744300
STGGKAPRKQLATK	_S(ad)TGGKAPRKQLATK_	K7EP01;Q16695;P68431;Q6NXT2;Q5TEC6;P84243;K7EMV3;B4DEB1;Q71DI3	K7EP01;Q16695;P68431;Q5TEC6;P84243;Q71DI3	Q71DI3	Histone H3.1t;Histone H3.1;Histone H3.3C;Histone H3;Histone H3.3;Histone H3.2	10min	669.987	3	661.973	1982.9	0.32521	0.00021528	-0.15295	-0.00010125	0.00012892	59.248	0.93547	1.1009	26106000	12925000	13181000
STGGKAPRKQLATK	_S(ad)TGGKAPRKQLATK_	K7EP01;Q16695;P68431;Q6NXT2;Q5TEC6;P84243;K7EMV3;B4DEB1;Q71DI3	K7EP01;Q16695;P68431;Q5TEC6;P84243;Q71DI3	Q71DI3	Histone H3.1t;Histone H3.1;Histone H3.3C;Histone H3;Histone H3.3;Histone H3.2	10min	662.307	3	661.973	1982.9	0.33646	0.00022273	-0.41876	-0.00027721	0.00037572	52.527	1.101	1.327	15216000	6932700	8282900
STGGKAPRKQLATKAAR	_S(ad)TGGKAPRKQLATKAAR_	K7EP01;P68431;Q6NXT2;Q5TEC6;P84243;K7EMV3;B4DEB1;Q71DI3	K7EP01;P68431;Q5TEC6;P84243;Q71DI3	Q71DI3	Histone H3.1;Histone H3.3C;Histone H3;Histone H3.3;Histone H3.2	10min	577.285	4	571.276	2281.07	0.44114	0.00025201	-0.30887	-0.00017645	3.9807e-05	52.52	1.1383	1.4271	10202000	4574700	5627200
TKQTARKSTGGKAPR	_TKQTARKS(ad)TGGKAPR_	K7EP01;Q16695;P68431;Q6NXT2;Q5TEC6;P84243;K7EMV3;B4DEB1;Q71DI3	K7EP01;Q16695;P68431;Q5TEC6;P84243;Q71DI3	Q71DI3	Histone H3.1t;Histone H3.1;Histone H3.3C;Histone H3;Histone H3.3;Histone H3.2	10min	539.009	4	532.748	2126.96	0.13484	7.1835e-05	-0.35086	-0.00018692	0.00098737	42.947	1.6778	2.0061	22081000	7102400	14979000

## Sheet: 120 min
Sequence	Modified.sequence	Proteins	Leading.proteins	Leading.razor.protein	Protein.names	Experiment	MS.MS.m.z	Charge	m.z	Mass	Mass.Error..ppm.	Mass.Error..Da.	Uncalibrated.Mass.Error..ppm.	Uncalibrated.Mass.Error..Da.	PEP	Score	Ratio.H.L	Ratio.H.L.normalized	Intensity	Intensity.L	Intensity.H
ARTKQTARKSTGGKAPR	_ARTKQTARKS(ad)TGGK(ac)APR_	K7EP01;Q16695;P68431;Q6NXT2;Q5TEC6;P84243;K7EMV3;B4DEB1;Q71DI3	K7EP01;Q16695;P68431;Q5TEC6;P84243;Q71DI3	Q71DI3	Histone H3.1t;Histone H3.1;Histone H3.3C;Histone H3;Histone H3.3;Histone H3.2	120min	600.537	4	600.035	2396.11	0.19525	0.00011716	NA	NA	0.00027979	57.973	0.077615	0.10768	50436000	49063000	1372800
ARTKQTARKSTGGKAPR	_ARTKQTARKS(ad)TGGKAPR_	K7EP01;Q16695;P68431;Q6NXT2;Q5TEC6;P84243;K7EMV3;B4DEB1;Q71DI3	K7EP01;Q16695;P68431;Q5TEC6;P84243;Q71DI3	Q71DI3	Histone H3.1t;Histone H3.1;Histone H3.3C;Histone H3;Histone H3.3;Histone H3.2	120min	472.028	5	471.827	2354.1	-0.0074674	-3.5233e-06	NA	NA	0.00093641	48.677	0.051841	0.070862	22509000	21250000	1259300
KSTGGKAPR	_KS(ad)TGGK(ac)APR_	K7EP01;Q16695;P68431;Q6NXT2;Q5TEC6;P84243;K7EMV3;B4DEB1;Q71DI3	K7EP01;Q16695;P68431;Q5TEC6;P84243;Q71DI3	Q71DI3	Histone H3.1t;Histone H3.1;Histone H3.3C;Histone H3;Histone H3.3;Histone H3.2	120min	742.8	2	742.8	1483.59	NA	NA	NA	NA	0.00073924	59.067	NA	NA	NA	NA	NA
KSTGGKAPR	_KS(ad)TGGK(ac)APR_	K7EP01;Q16695;P68431;Q6NXT2;Q5TEC6;P84243;K7EMV3;B4DEB1;Q71DI3	K7EP01;Q16695;P68431;Q5TEC6;P84243;Q71DI3	Q71DI3	Histone H3.1t;Histone H3.1;Histone H3.3C;Histone H3;Histone H3.3;Histone H3.2	120min	742.802	2	742.8	1483.59	0.025122	1.866e-05	NA	NA	0.00081103	59.908	0.021078	0.024777	23618000	23058000	560280
KSTGGKAPR	_KS(ad)TGGK(ac)APR_	K7EP01;Q16695;P68431;Q6NXT2;Q5TEC6;P84243;K7EMV3;B4DEB1;Q71DI3	K7EP01;Q16695;P68431;Q5TEC6;P84243;Q71DI3	Q71DI3	Histone H3.1t;Histone H3.1;Histone H3.3C;Histone H3;Histone H3.3;Histone H3.2	120min	495.535	3	495.536	1483.59	0.053745	2.6633e-05	NA	NA	0.00027828	79.148	NA	NA	14307000	14000000	306790
KSTGGKAPR	_KS(ad)TGGK(ac)APR_	K7EP01;Q16695;P68431;Q6NXT2;Q5TEC6;P84243;K7EMV3;B4DEB1;Q71DI3	K7EP01;Q16695;P68431;Q5TEC6;P84243;Q71DI3	Q71DI3	Histone H3.1t;Histone H3.1;Histone H3.3C;Histone H3;Histone H3.3;Histone H3.2	120min	742.8	2	742.8	1483.59	-0.0033928	-2.5202e-06	-0.2139	-0.00015889	0.0008451	61.161	0.023308	0.026881	17606000	17044000	561880
KSTGGKAPR	_KS(ad)TGGK(ac)APR_	K7EP01;Q16695;P68431;Q6NXT2;Q5TEC6;P84243;K7EMV3;B4DEB1;Q71DI3	K7EP01;Q16695;P68431;Q5TEC6;P84243;Q71DI3	Q71DI3	Histone H3.1t;Histone H3.1;Histone H3.3C;Histone H3;Histone H3.3;Histone H3.2	120min	495.536	3	495.536	1483.59	0.031853	1.5784e-05	NA	NA	0.00096126	58.699	0.028207	0.033041	13071000	12704000	366560
KSTGGKAPR	_K(me)S(ad)TGGK(ac)APR_	K7EP01;Q16695;P68431;Q6NXT2;Q5TEC6;P84243;K7EMV3;B4DEB1;Q71DI3	K7EP01;Q16695;P68431;Q5TEC6;P84243;Q71DI3	Q71DI3	Histone H3.1t;Histone H3.1;Histone H3.3C;Histone H3;Histone H3.3;Histone H3.2	120min	749.808	2	749.808	1497.6	-0.19466	-0.00014596	NA	NA	0.00067338	59.908	NA	NA	18303000	17238000	1064600
PDPAKSAPAPKKGSK	_PDPAKS(ad)APAPKKGSK_	Q93079;Q5QNW6;Q5QNW6-2	Q93079;Q5QNW6	Q93079	Histone H2B type 1-H;Histone H2B type 2-F	120min	674.304	3	673.969	2018.89	-0.10909	-7.3522e-05	NA	NA	0.00047782	59.68	NA	NA	9931300	9931300	0
PDPAKSAPAPKKGSK	_PDPAKS(ad)APAPKKGSK_	Q93079;Q5QNW6;Q5QNW6-2	Q93079;Q5QNW6	Q93079	Histone H2B type 1-H;Histone H2B type 2-F	120min	673.97	3	673.969	2018.89	-0.3919	-0.00026413	NA	NA	0.0005326	56.872	NA	NA	5405200	5084000	321220
PELAKSAPAPK	_PELAKS(ad)APAPK_	Q99880	Q99880	Q99880	Histone H2B type 1-L	120min	825.853	2	825.352	1648.69	-0.39562	-0.00032652	NA	NA	0.00067421	69.672	NA	NA	4662200	4662200	0
PELAKSAPAPKKGSK	_PELAKS(ad)APAPKKGSK_	Q99880	Q99880	Q99880	Histone H2B type 1-L	120min	683.985	3	683.985	2048.93	-0.85501	-0.00058481	NA	NA	0.00049332	58.885	NA	NA	4334000	4334000	0
PEPAKSAPAPK	_PEPAKS(ad)APAPK_	B2R4S9;P62807;Q16778;O60814;P57053	B2R4S9;Q16778;O60814;P57053	B2R4S9	Histone H2B;Histone H2B type 1-C/E/F/G/I;Histone H2B type 2-E;Histone H2B type 1-K;Histone H2B type F-S	120min	545.227	3	545.227	1632.66	0.25043	0.00013654	-0.19783	-0.00010786	4.0683e-06	89.466	0.024531	0.033752	78232000	75777000	2454600
PEPAKSAPAPK	_PEPAKS(ad)APAPK_	B2R4S9;P62807;Q16778;O60814;P57053	B2R4S9;Q16778;O60814;P57053	B2R4S9	Histone H2B;Histone H2B type 1-C/E/F/G/I;Histone H2B type 2-E;Histone H2B type 1-K;Histone H2B type F-S	120min	817.337	2	817.337	1632.66	-0.002734	-2.2346e-06	NA	NA	0.00063579	70.889	0.022042	0.030199	101850000	99930000	1923200
PEPAKSAPAPK	_PEPAKS(ad)APAPK_	B2R4S9;P62807;Q16778;O60814;P57053	B2R4S9;Q16778;O60814;P57053	B2R4S9	Histone H2B;Histone H2B type 1-C/E/F/G/I;Histone H2B type 2-E;Histone H2B type 1-K;Histone H2B type F-S	120min	817.336	2	817.337	1632.66	-0.047337	-3.869e-05	-0.064193	-5.2467e-05	0.00018346	60.157	0.024115	0.034692	56759000	55511000	1248300
PEPAKSAPAPK	_PEPAKS(ad)APAPK_	B2R4S9;P62807;Q16778;O60814;P57053	B2R4S9;Q16778;O60814;P57053	B2R4S9	Histone H2B;Histone H2B type 1-C/E/F/G/I;Histone H2B type 2-E;Histone H2B type 1-K;Histone H2B type F-S	120min	545.226	3	545.227	1632.66	0.32141	0.00017524	-0.099913	-5.4475e-05	2.6337e-05	68.329	0.020283	0.029149	68078000	66889000	1188700
PEPAKSAPAPKKGSK	_PEPAKS(ad)APAPKKGSK_	B2R4S9;P62807;Q16778;O60814;P57053	B2R4S9;Q16778;O60814;P57053	B2R4S9	Histone H2B;Histone H2B type 1-C/E/F/G/I;Histone H2B type 2-E;Histone H2B type 1-K;Histone H2B type F-S	120min	509.232	4	509.233	2032.9	-0.44194	-0.00022505	NA	NA	3.5934e-05	79.193	0.060001	0.081971	91665000	85889000	5775000
PEPAKSAPAPKKGSK	_PEPAKS(ad)APAPKKGSK_	B2R4S9;P62807;Q16778;O60814;P57053	B2R4S9;Q16778;O60814;P57053	B2R4S9	Histone H2B;Histone H2B type 1-C/E/F/G/I;Histone H2B type 2-E;Histone H2B type 1-K;Histone H2B type F-S	120min	678.975	3	678.641	2032.9	-0.046456	-3.1527e-05	NA	NA	2.1791e-05	82.562	0.048347	0.066168	97933000	92528000	5404600
PEPAKSAPAPKKGSK	_PEPAKS(ad)APAPKKGSK_	B2R4S9;P62807;Q16778;O60814;P57053	B2R4S9;Q16778;O60814;P57053	B2R4S9	Histone H2B;Histone H2B type 1-C/E/F/G/I;Histone H2B type 2-E;Histone H2B type 1-K;Histone H2B type F-S	120min	678.976	3	678.641	2032.9	-0.25	-0.00016966	NA	NA	0.00025318	70.41	0.020744	0.029528	52406000	51039000	1367100
PEPAKSAPAPKKGSK	_PEPAKS(ad)APAPKK(ac)GSK_	B2R4S9;P62807;Q16778;O60814;P57053	B2R4S9;Q16778;O60814;P57053	B2R4S9	Histone H2B;Histone H2B type 1-C/E/F/G/I;Histone H2B type 2-E;Histone H2B type 1-K;Histone H2B type F-S	120min	693.313	3	692.645	2074.91	0.42433	0.00029391	NA	NA	0.00068075	54.281	NA	NA	11774000	11774000	0
PEPAKSAPAPKKGSK	_PEPAKS(ad)APAPK(ac)KGSK_	B2R4S9;P62807;Q16778;O60814;P57053	B2R4S9;Q16778;O60814;P57053	B2R4S9	Histone H2B;Histone H2B type 1-C/E/F/G/I;Histone H2B type 2-E;Histone H2B type 1-K;Histone H2B type F-S	120min	692.979	3	692.645	2074.91	-0.18801	-0.00013023	NA	NA	0.00093802	51.771	0.036104	0.047293	8354400	8140400	214000
PEPAKSAPAPKKGSKK	_PEPAKS(ad)APAPKKGSKK_	B2R4S9;P62807;Q16778;O60814;P57053	B2R4S9;Q16778;O60814;P57053	B2R4S9	Histone H2B;Histone H2B type 1-C/E/F/G/I;Histone H2B type 2-E;Histone H2B type 1-K;Histone H2B type F-S	120min	541.257	4	541.257	2161	0.23171	0.00012542	NA	NA	5.3049e-06	83.251	NA	NA	26507000	26507000	0
PEPAKSAPAPKKGSKK	_PEPAKS(ad)APAPKKGSKK_	B2R4S9;P62807;Q16778;O60814;P57053	B2R4S9;Q16778;O60814;P57053	B2R4S9	Histone H2B;Histone H2B type 1-C/E/F/G/I;Histone H2B type 2-E;Histone H2B type 1-K;Histone H2B type F-S	120min	541.507	4	541.257	2161	-0.085141	-4.6083e-05	-0.61084	-0.00033062	1.3012e-06	70.784	0.021278	0.028356	16233000	15595000	638060
PEPAKSAPAPKKGSKKAVTK	_PEPAKS(ad)APAPKKGSKKAVTK_	B2R4S9;P62807;Q16778;O60814;P57053	B2R4S9;Q16778;O60814;P57053	B2R4S9	Histone H2B;Histone H2B type 1-C/E/F/G/I;Histone H2B type 2-E;Histone H2B type 1-K;Histone H2B type F-S	120min	513.257	5	513.056	2560.25	-1.433	-0.00073519	NA	NA	0.00066945	50.752	NA	NA	7308100	7308100	0
PEPAKSAPAPKKGSKKAVTK	_PEPAKS(ad)APAPKKGSKKAVTK_	B2R4S9;P62807;Q16778;O60814;P57053	B2R4S9;Q16778;O60814;P57053	B2R4S9	Histone H2B;Histone H2B type 1-C/E/F/G/I;Histone H2B type 2-E;Histone H2B type 1-K;Histone H2B type F-S	120min	513.457	5	513.056	2560.25	-1.3346	-0.00068474	NA	NA	1.7355e-05	67.312	0.13197	0.17432	8021300	6946900	1074400
PEPSKSAPAPK	_PEPS(ad)K(me)SAPAPK_	U3KQK0;Q99877;P33778	U3KQK0;P33778	U3KQK0	Histone H2B;Histone H2B type 1-N;Histone H2B type 1-B	120min	832.342	2	832.342	1662.67	-0.39381	-0.00032778	NA	NA	0.0007431	66.989	0.014537	0.018583	11441000	11345000	95607
PEPSKSAPAPK	_PEPS(ad)K(me)SAPAPK_	U3KQK0;Q99877;P33778	U3KQK0;P33778	U3KQK0	Histone H2B;Histone H2B type 1-N;Histone H2B type 1-B	120min	555.23	3	555.23	1662.67	-0.066098	-3.6699e-05	NA	NA	0.00067813	67.385	0.015419	0.020313	15209000	15040000	168780
PEPSKSAPAPKKGSK	_PEPS(ad)KSAPAPKKGSK_	U3KQK0;Q99877;P33778	U3KQK0;P33778	U3KQK0	Histone H2B;Histone H2B type 1-N;Histone H2B type 1-B	120min	683.972	3	683.973	2048.9	0.19214	0.00013142	NA	NA	0.00016896	73.834	NA	NA	4776300	4776300	0
PEPVKSAPVPKKGSK	_PEPVKS(ad)APVPKKGSK_	Q99879	Q99879	Q99879	Histone H2B type 1-M	120min	697.329	3	697.329	2088.96	NA	NA	NA	NA	0.00026272	51.03	NA	NA	NA	NA	NA
PEPVKSAPVPKKGSK	_PEPVKS(ad)APVPKKGSK_	Q99879	Q99879	Q99879	Histone H2B type 1-M	120min	697.329	3	697.329	2088.96	0.65834	0.00045908	NA	NA	0.00050905	58.079	NA	NA	3333200	3183000	150240
QTARKSTGGKAPR	_QTARKS(ad)TGGK(ac)APR_	K7EP01;Q16695;P68431;Q6NXT2;Q5TEC6;P84243;K7EMV3;B4DEB1;Q71DI3	K7EP01;Q16695;P68431;Q5TEC6;P84243;Q71DI3	Q71DI3	Histone H3.1t;Histone H3.1;Histone H3.3C;Histone H3;Histone H3.3;Histone H3.2	120min	647.952	3	647.617	1939.83	0.15599	0.00010102	NA	NA	0.00077434	68.576	NA	NA	32944000	32643000	301720
QTARKSTGGKAPR	_QTARKS(ad)TGGKAPR_	K7EP01;Q16695;P68431;Q6NXT2;Q5TEC6;P84243;K7EMV3;B4DEB1;Q71DI3	K7EP01;Q16695;P68431;Q5TEC6;P84243;Q71DI3	Q71DI3	Histone H3.1t;Histone H3.1;Histone H3.3C;Histone H3;Histone H3.3;Histone H3.2	120min	633.948	3	633.614	1897.82	-0.2775	-0.00017583	-0.51381	-0.00032555	0.00069418	49.097	0.033251	0.044943	24128000	23044000	1084100
SAPATGGVKKPHR	_S(ad)APATGGVK(me)K(me)PHR_	Q16695;P68431;Q5TEC6;Q71DI3	Q16695;P68431;Q5TEC6;Q71DI3	Q71DI3	Histone H3.1t;Histone H3.1;Histone H3;Histone H3.2	120min	625.615	3	625.615	1873.82	-0.038149	-2.3867e-05	NA	NA	0.00069281	69.03	0.18186	0.24739	12079000	10328000	1751800
SAPATGGVKKPHR	_S(ad)APATGGVK(me)K(me)PHR_	Q16695;P68431;Q5TEC6;Q71DI3	Q16695;P68431;Q5TEC6;Q71DI3	Q71DI3	Histone H3.1t;Histone H3.1;Histone H3;Histone H3.2	120min	469.463	4	469.463	1873.82	-0.56613	-0.00026578	NA	NA	0.0007597	67.997	NA	NA	4865200	4825100	40005
SAPATGGVKKPHR	_S(ad)APATGGVK(me)K(me)PHR_	Q16695;P68431;Q5TEC6;Q71DI3	Q16695;P68431;Q5TEC6;Q71DI3	Q71DI3	Histone H3.1t;Histone H3.1;Histone H3;Histone H3.2	120min	625.949	3	625.615	1873.82	-0.079236	-4.9571e-05	-0.42734	-0.00026735	2.2865e-06	71.176	0.14165	0.16945	46931000	38498000	8432900
SAPATGGVKKPHR	_S(ad)APATGGVK(me)K(me)PHR_	Q16695;P68431;Q5TEC6;Q71DI3	Q16695;P68431;Q5TEC6;Q71DI3	Q71DI3	Histone H3.1t;Histone H3.1;Histone H3;Histone H3.2	120min	469.713	4	469.463	1873.82	0.053477	2.5106e-05	NA	NA	1.9186e-07	100.22	0.09178	0.10788	23577000	21434000	2143300
SAPATGGVKKPHR	_S(ad)APATGGVK(me)K(me)PHR_	Q16695;P68431;Q5TEC6;Q71DI3	Q16695;P68431;Q5TEC6;Q71DI3	Q71DI3	Histone H3.1t;Histone H3.1;Histone H3;Histone H3.2	120min	469.463	4	469.463	1873.82	0.085113	3.9957e-05	-0.35782	-0.00016798	4.0798e-12	86.803	0.12932	0.14877	19776000	17720000	2056300
SAPATGGVKKPHR	_S(ad)APATGGVK(me)K(me)PHR_	Q16695;P68431;Q5TEC6;Q71DI3	Q16695;P68431;Q5TEC6;Q71DI3	Q71DI3	Histone H3.1t;Histone H3.1;Histone H3;Histone H3.2	120min	626.283	3	625.615	1873.82	0.35313	0.00022092	-0.3058	-0.00019132	4.555e-12	86.803	0.11396	0.13492	37621000	34530000	3090200
SAPATGGVKKPHR	_S(ad)APATGGVK(me)KPHR_	Q16695;P68431;Q5TEC6;Q71DI3	Q16695;P68431;Q5TEC6;Q71DI3	Q71DI3	Histone H3.1t;Histone H3.1;Histone H3;Histone H3.2	120min	621.277	3	620.943	1859.81	NA	NA	NA	NA	9.1911e-05	59.227	NA	NA	NA	NA	NA
SAPATGGVKKPHR	_S(ad)APATGGVK(me)KPHR_	Q16695;P68431;Q5TEC6;Q71DI3	Q16695;P68431;Q5TEC6;Q71DI3	Q71DI3	Histone H3.1t;Histone H3.1;Histone H3;Histone H3.2	120min	620.942	3	620.943	1859.81	0.08278	5.1401e-05	NA	NA	0.00063608	70.438	0.52368	0.6159	26174000	15222000	10952000
SAPATGGVKKPHR	_S(ad)APATGGVK(me)KPHR_	Q16695;P68431;Q5TEC6;Q71DI3	Q16695;P68431;Q5TEC6;Q71DI3	Q71DI3	Histone H3.1t;Histone H3.1;Histone H3;Histone H3.2	120min	465.96	4	465.959	1859.81	0.1369	6.3789e-05	NA	NA	1.2068e-07	101.53	0.41668	0.49491	13245000	8940400	4304700
SAPATGGVKKPHR	_S(ad)APATGGVK(me)KPHR_	Q16695;P68431;Q5TEC6;Q71DI3	Q16695;P68431;Q5TEC6;Q71DI3	Q71DI3	Histone H3.1t;Histone H3.1;Histone H3;Histone H3.2	120min	465.959	4	465.959	1859.81	-0.041711	-1.9436e-05	NA	NA	1.9203e-07	100.22	0.46206	0.5288	10004000	5886700	4117400
SGRGKGGKGLGKGGAK	_(ac)S(ad)GRGKGGKGLGKGGAK_	P62805	P62805	P62805	Histone H4	120min	666.637	3	666.637	1996.89	0.16377	0.00010918	-0.28611	-0.00019073	0.00064683	42.682	0.05927	0.079507	6820900	6415900	405070
SGRGKGGKGLGKGGAKR	_(ac)S(ad)GRGKGGKGLGKGGAKR_	P62805	P62805	P62805	Histone H4	120min	539.505	4	539.255	2152.99	-0.32008	-0.0001726	-0.54254	-0.00029257	2.9614e-07	68.42	0.064687	0.088493	96383000	87664000	8718100
SGRGKGGKGLGKGGAKR	_(ac)S(ad)GRGKGGKGLGKGGAKR_	P62805	P62805	P62805	Histone H4	120min	539.505	4	539.255	2152.99	0.071787	3.8712e-05	-0.54173	-0.00029213	1.4321e-05	55.453	0.054447	0.078141	72129000	68453000	3675900
SGRGKGGKGLGKGGAKR	_(ac)S(ad)GRGKGGKGLGKGGAK(ac)R_	P62805	P62805	P62805	Histone H4	120min	733.008	3	732.674	2195	0.18502	0.00013556	NA	NA	5.2175e-05	79.346	NA	NA	45965000	44712000	1252900
SGRGKGGKGLGKGGAKR	_(ac)S(ad)GRGKGGK(ac)GLGK(ac)GGAK(ac)R_	P62805	P62805	P62805	Histone H4	120min	761.014	3	760.681	2279.02	-0.65317	-0.00049685	NA	NA	0.00044287	73.279	NA	NA	8323800	8323800	0
SGRGKGGKGLGKGGAKR	_S(ad)GRGKGGK(ac)GLGKGGAKR_	P62805	P62805	P62805	Histone H4	120min	547.268	4	539.255	2152.99	0.071787	3.8712e-05	-0.54173	-0.00029213	0.00022074	41.695	0.054447	0.078141	72129000	68453000	3675900
STGGKAPR	_S(ad)TGGKAPR_	K7EP01;Q16695;P68431;Q6NXT2;Q5TEC6;P84243;K7EMV3;B4DEB1;Q71DI3	K7EP01;Q16695;P68431;Q5TEC6;P84243;Q71DI3	Q71DI3	Histone H3.1t;Histone H3.1;Histone H3.3C;Histone H3;Histone H3.3;Histone H3.2	120min	657.748	2	657.747	1313.48	0.14195	9.3365e-05	NA	NA	0.00029094	93.429	0.039565	0.051276	16802000	16205000	596690
STGGKAPR	_S(ad)TGGKAPR_	K7EP01;Q16695;P68431;Q6NXT2;Q5TEC6;P84243;K7EMV3;B4DEB1;Q71DI3	K7EP01;Q16695;P68431;Q5TEC6;P84243;Q71DI3	Q71DI3	Histone H3.1t;Histone H3.1;Histone H3.3C;Histone H3;Histone H3.3;Histone H3.2	120min	657.748	2	657.747	1313.48	0.54574	0.00035896	-0.11256	-7.4035e-05	0.00081456	68.224	0.024632	0.031691	12527000	12229000	298310
STGGKAPR	_S(ad)TGGK(ac)APR_	K7EP01;Q16695;P68431;Q6NXT2;Q5TEC6;P84243;K7EMV3;B4DEB1;Q71DI3	K7EP01;Q16695;P68431;Q5TEC6;P84243;Q71DI3	Q71DI3	Histone H3.1t;Histone H3.1;Histone H3.3C;Histone H3;Histone H3.3;Histone H3.2	120min	678.753	2	678.753	1355.49	0.23826	0.00016172	NA	NA	0.00048054	86.67	NA	NA	13419000	13187000	232710
STGGKAPR	_S(ad)TGGK(ac)APR_	K7EP01;Q16695;P68431;Q6NXT2;Q5TEC6;P84243;K7EMV3;B4DEB1;Q71DI3	K7EP01;Q16695;P68431;Q5TEC6;P84243;Q71DI3	Q71DI3	Histone H3.1t;Histone H3.1;Histone H3.3C;Histone H3;Histone H3.3;Histone H3.2	120min	678.752	2	678.753	1355.49	-0.23687	-0.00016077	NA	NA	0.00089922	76.679	NA	NA	9762500	9653600	108870
STGGKAPR	_S(ad)TGGK(ac)APR_	K7EP01;Q16695;P68431;Q6NXT2;Q5TEC6;P84243;K7EMV3;B4DEB1;Q71DI3	K7EP01;Q16695;P68431;Q5TEC6;P84243;Q71DI3	Q71DI3	Histone H3.1t;Histone H3.1;Histone H3.3C;Histone H3;Histone H3.3;Histone H3.2	120min	678.753	2	678.753	1355.49	-0.29502	-0.00020024	NA	NA	0.00048054	86.67	NA	NA	32850000	32415000	434690
STGGKAPRKQLATK	_S(ad)TGGK(ac)APRKQLATK_	K7EP01;Q16695;P68431;Q6NXT2;Q5TEC6;P84243;K7EMV3;B4DEB1;Q71DI3	K7EP01;Q16695;P68431;Q5TEC6;P84243;Q71DI3	Q71DI3	Histone H3.1t;Histone H3.1;Histone H3.3C;Histone H3;Histone H3.3;Histone H3.2	120min	676.311	3	675.977	2024.91	-0.8852	-0.00059837	NA	NA	0.00049691	68.972	NA	NA	5363200	5363200	0
