# Supplementary material for: Serine ADP-ribosylation reversal by the hydrolase ARH3
Source: eLife. 2017 Jun 26;6:e28533. doi: 10.7554/eLife.28533 (PMC5552275; doi:10.7554/eLife.28533)
Supplement: Figure 2—source data 1. — ADPr identified peptide features from SILAC experiments performed to quantify ADPr removal upon in vitro incubation of purified Ser-ADPr histones with or without recombinant ARH3 (Figure 2D). DOI: http://dx.doi.org/10.7554/eLife.28533.007 [file elife-28533-fig2-data1.xlsx]

## Sheet: Control
Sequence	Modified.sequence	Proteins	Leading.proteins	Leading.razor.protein	Protein.names	Experiment	MS.MS.m.z	Charge	m.z	Mass	Mass.Error..ppm.	Mass.Error..Da.	Uncalibrated.Mass.Error..ppm.	Uncalibrated.Mass.Error..Da.	PEP	Score	Ratio.H.L	Ratio.H.L.normalized	Intensity	Intensity.L	Intensity.H
ARTKQTARKSTGGKAPR	_ARTKQTARKS(ad)TGGK(ac)APR_	Q16695;P68431;Q6NXT2;Q5TEC6;Q71DI3;P84243;K7EMV3;B4DEB1;K7EP01	Q16695;P68431;Q5TEC6;Q71DI3;P84243	Q71DI3	Histone H3.1t;Histone H3.1;Histone H3.3C;Histone H3;Histone H3.2;Histone H3.3	Control	606.046	4	600.035	2396.11	0.2904	0.00017425	-0.18544	-0.00011127	1.2398e-06	65.954	1.3829	1.3768	47656000	19425000	28231000
KSTGGKAPRKQLATKAAR	_KS(ad)TGGK(ac)APRKQLATK(ac)AAR_	P68431;Q6NXT2;Q5TEC6;Q71DI3;P84243;K7EMV3;B4DEB1;K7EP01	P68431;Q5TEC6;Q71DI3;P84243	Q71DI3	Histone H3.1;Histone H3.3C;Histone H3;Histone H3.2;Histone H3.3	Control	632.318	4	624.305	2493.19	0.18342	0.00011451	-0.14576	-9.0996e-05	2.7301e-05	56.081	1.412	1.4235	18552000	7159000	11393000
PDPAKSAPAPK	_PDPAKS(ad)APAPK_	P23527;Q5QNW6;Q5QNW6-2	P23527;Q5QNW6	P23527	Histone H2B type 1-O;Histone H2B type 2-F	Control	818.342	2	810.329	1618.64	0.51268	0.00041544	-0.088516	-7.1727e-05	3.9302e-05	75.01	1.5989	1.5969	17033000	5642500	11390000
PDPAKSAPAPKKGSK	_PDPAKS(ad)APAPKKGSK_	P23527;Q5QNW6;Q5QNW6-2	P23527;Q5QNW6	P23527	Histone H2B type 1-O;Histone H2B type 2-F	Control	674.303	3	673.969	2018.89	-0.16797	-0.00011321	-0.30926	-0.00020843	8.7887e-05	49.595	1.1799	1.1928	12285000	5565700	6719400
PELAKSAPAPK	_PELAKS(ad)APAPK_	Q99880	Q99880	Q99880	Histone H2B type 1-L	Control	555.913	3	550.571	1648.69	-0.345	-0.00018994	-0.55345	-0.00030471	0.00011284	64.244	1.29	1.3008	9578100	4204800	5373300
PELAKSAPAPK	_PELAKS(ad)APAPK_	Q99880	Q99880	Q99880	Histone H2B type 1-L	Control	825.353	2	825.352	1648.69	0.0065798	5.4306e-06	-0.177	-0.00014608	1.4163e-05	80.507	1.4874	1.4854	8246900	4163200	4083700
PELAKSAPAPKKGSK	_PELAKS(ad)APAPKKGSK_	Q99880	Q99880	Q99880	Histone H2B type 1-L	Control	694.671	3	683.985	2048.93	NA	NA	NA	NA	4.132e-05	57.288	NA	NA	NA	NA	NA
PEPAKSAPAPK	_PEPAKS(ad)APAPK_	B2R4S9;P62807;P06899;Q16778	B2R4S9;P06899;Q16778	Q16778	Histone H2B;Histone H2B type 1-C/E/F/G/I;Histone H2B type 1-J;Histone H2B type 2-E	Control	550.569	3	545.227	1632.66	0.017767	9.6869e-06	-0.16545	-9.0206e-05	0.00029161	59.705	1.213	1.1952	88713000	41350000	47363000
PEPAKSAPAPK	_PEPAKS(ad)APAPK_	B2R4S9;P62807;P06899;Q16778	B2R4S9;P06899;Q16778	Q16778	Histone H2B;Histone H2B type 1-C/E/F/G/I;Histone H2B type 1-J;Histone H2B type 2-E	Control	817.838	2	817.337	1632.66	0.060744	4.9648e-05	-0.1155	-9.44e-05	1.8077e-05	79.652	1.1717	1.1543	96533000	45318000	51215000
PEPAKSAPAPKKGSK	_PEPAKS(ad)APAPKKGSK_	B2R4S9;P62807;P06899;Q16778	B2R4S9;P06899;Q16778	Q16778	Histone H2B;Histone H2B type 1-C/E/F/G/I;Histone H2B type 1-J;Histone H2B type 2-E	Control	689.327	3	678.641	2032.9	0.020465	1.3888e-05	-0.32437	-0.00022013	7.4873e-06	63.062	1.0744	1.0595	56477000	26510000	29967000
PEPAKSAPAPKKGSK	_PEPAKS(ad)APAPKKGSK_	B2R4S9;P62807;P06899;Q16778	B2R4S9;P06899;Q16778	Q16778	Histone H2B;Histone H2B type 1-C/E/F/G/I;Histone H2B type 1-J;Histone H2B type 2-E	Control	509.483	4	509.233	2032.9	0.12331	6.2794e-05	NA	NA	0.00011992	56.514	1.1642	1.1468	69200000	30314000	38886000
PEPAKSAPAPKKGSK	_PEPAKS(ad)APAPKK(ac)GSK_	B2R4S9;P62807;P06899;Q16778	B2R4S9;P06899;Q16778	Q16778	Histone H2B;Histone H2B type 1-C/E/F/G/I;Histone H2B type 1-J;Histone H2B type 2-E	Control	692.644	3	692.645	2074.91	0.2537	0.00017572	-0.18859	-0.00013063	2.774e-06	65.085	1.1912	1.1965	13302000	5954500	7347300
PEPAKSAPAPKKGSKK	_PEPAKS(ad)APAPKKGSKK_	B2R4S9;P62807;P06899;Q16778	B2R4S9;P06899;Q16778	Q16778	Histone H2B;Histone H2B type 1-C/E/F/G/I;Histone H2B type 1-J;Histone H2B type 2-E	Control	551.274	4	541.257	2161	0.034582	1.8718e-05	-0.37562	-0.00020331	7.0057e-07	66.436	1.1122	1.1291	35793000	16034000	19758000
PEPAKSAPAPKKGSKKAVTK	_PEPAKS(ad)APAPKKGSKKAVTK_	B2R4S9;P62807;P06899;Q16778	B2R4S9;P06899;Q16778	Q16778	Histone H2B;Histone H2B type 1-C/E/F/G/I;Histone H2B type 1-J;Histone H2B type 2-E	Control	513.053	5	513.056	2560.25	-0.72117	-0.00037	-1.1599	-0.00059507	4.7097e-07	66.536	1.0765	1.0893	10190000	4788300	5401800
PEPSKSAPAPK	_PEPS(ad)K(me)SAPAPK_	U3KQK0;Q99877	U3KQK0	U3KQK0	Histone H2B;Histone H2B type 1-N	Control	832.844	2	832.342	1662.67	0.0714	5.943e-05	-0.2323	-0.00019335	2.6698e-05	71.879	1.1699	1.19	20161000	9070700	11090000
PEPSKSAPAPK	_PEPS(ad)K(me)SAPAPK_	U3KQK0;Q99877	U3KQK0	U3KQK0	Histone H2B;Histone H2B type 1-N	Control	555.23	3	555.23	1662.67	0.02772	1.5391e-05	-0.31359	-0.00017412	3.431e-05	68.536	1.1163	1.1307	21256000	9476800	11779000
PEPSKSAPAPK	_PEPS(ad)KSAPAPK_	U3KQK0;Q99877	U3KQK0	U3KQK0	Histone H2B;Histone H2B type 1-N	Control	833.348	2	825.334	1648.65	NA	NA	NA	NA	3.9065e-06	66.989	NA	NA	NA	NA	NA
PEPSKSAPAPKKGSK	_PEPS(ad)KSAPAPKKGSK_	U3KQK0;Q99877	U3KQK0	U3KQK0	Histone H2B;Histone H2B type 1-N	Control	513.482	4	513.232	2048.9	-0.26161	-0.00013427	-0.69146	-0.00035488	0.0005214	44.252	1.4883	1.4843	4363900	1705500	2658400
PEPSKSAPAPKKGSK	_PEPS(ad)K(me)SAPAPKKGSK_	U3KQK0;Q99877	U3KQK0	U3KQK0	Histone H2B;Histone H2B type 1-N	Control	699.331	3	688.645	2062.91	0.23969	0.00016506	-0.19568	-0.00013475	1.4839e-05	63.29	1.0961	1.0898	16057000	7853300	8203700
PEPSKSAPAPKKGSK	_PEPS(ad)K(me)SAPAPKKGSK_	U3KQK0;Q99877	U3KQK0	U3KQK0	Histone H2B;Histone H2B type 1-N	Control	516.736	4	516.735	2062.91	0.36549	0.00018886	-0.078449	-4.0537e-05	4.5407e-08	71.08	1.1784	1.1862	23849000	10629000	13220000
PEPVKSAPVPK	_PEPVKS(ad)APVPK_	Q99879	Q99879	Q99879	Histone H2B type 1-M	Control	563.915	3	563.914	1688.72	0.17189	9.6934e-05	-0.31212	-0.00017601	0.00052153	53.869	1.2151	1.2112	7916500	2703900	5212500
QTARKSTGGKAPR	_QTARKS(ad)TGGK(ac)APR_	Q16695;P68431;Q6NXT2;Q5TEC6;Q71DI3;P84243;K7EMV3;B4DEB1;K7EP01	Q16695;P68431;Q5TEC6;Q71DI3;P84243	Q71DI3	Histone H3.1t;Histone H3.1;Histone H3.3C;Histone H3;Histone H3.2;Histone H3.3	Control	652.96	3	647.617	1939.83	0.016084	1.0416e-05	-0.24199	-0.00015672	4.1343e-05	60.196	1.3602	1.3699	25330000	10948000	14382000
QTARKSTGGKAPRKQLATKAAR	_QTARKS(ad)TGGK(ac)APRKQLATK(ac)AAR_	P68431;Q6NXT2;Q5TEC6;Q71DI3;P84243;K7EMV3;B4DEB1;K7EP01	P68431;Q5TEC6;Q71DI3;P84243	Q71DI3	Histone H3.1;Histone H3.3C;Histone H3;Histone H3.2;Histone H3.3	Control	597.505	5	590.894	2949.43	-0.15057	-8.8969e-05	-0.69511	-0.00041074	1.0039e-05	56.681	1.7193	1.7071	15377000	6973800	8403400
SAPATGGVKKPHR	_S(ad)APATGGVK(me)K(me)PHR_	Q16695;P68431;Q5TEC6;Q71DI3	Q16695;P68431;Q5TEC6;Q71DI3	Q71DI3	Histone H3.1t;Histone H3.1;Histone H3;Histone H3.2	Control	630.959	3	625.615	1873.82	0.8113	0.00050756	0.40848	0.00025555	9.3553e-05	61.11	1.4443	1.4525	5271400	2244600	3026800
SGRGKGGKGLGKGGAKR	_(ac)S(ad)GRGKGGKGLGKGGAK(ac)R_	P62805	P62805	P62805	Histone H4	Control	732.674	3	732.674	2195	-0.10573	-7.7466e-05	-0.10849	-7.9487e-05	1.6515e-05	62.055	1.2532	1.2392	52395000	21171000	31223000
SGRGKGGKGLGKGGAKR	_(ac)S(ad)GRGKGGKGLGKGGAK(ac)R_	P62805	P62805	P62805	Histone H4	Control	557.771	4	549.757	2195	0.1405	7.7239e-05	-0.20122	-0.00011062	2.0359e-08	72.99	1.4094	1.3883	104720000	40998000	63719000
SGRGKGGKGLGKGGAKR	_(ac)S(ad)GRGK(ac)GGKGLGKGGAK(ac)R_	P62805	P62805	P62805	Histone H4	Control	757.363	3	746.677	2237.01	-0.036406	-2.7183e-05	-0.14635	-0.00010928	5.2957e-05	50.077	1.427	1.451	32170000	14616000	17553000
STGGKAPRKQLATK	_S(ad)TGGK(ac)APRKQLATK_	Q16695;P68431;Q6NXT2;Q5TEC6;Q71DI3;P84243;K7EMV3;B4DEB1;K7EP01	Q16695;P68431;Q5TEC6;Q71DI3;P84243	Q71DI3	Histone H3.1t;Histone H3.1;Histone H3.3C;Histone H3;Histone H3.2;Histone H3.3	Control	676.312	3	675.977	2024.91	0.30636	0.00020709	0.032113	2.1708e-05	0.00041788	46.89	1.2761	1.2758	13950000	5674000	8275900
STGGKAPRKQLATKAAR	_S(ad)TGGK(ac)APRKQLATK(ac)AAR_	P68431;Q6NXT2;Q5TEC6;Q71DI3;P84243;K7EMV3;B4DEB1;K7EP01	P68431;Q5TEC6;Q71DI3;P84243	Q71DI3	Histone H3.1;Histone H3.3C;Histone H3;Histone H3.2;Histone H3.3	Control	797.385	3	789.372	2365.09	-0.23846	-0.00018824	-0.38851	-0.00030668	0.00032761	47.68	1.5077	1.5144	13298000	4219800	9078200

## Sheet: ARH3
Sequence	Modified.sequence	Proteins	Leading.proteins	Leading.razor.protein	Protein.names	Experiment	MS.MS.m.z	Charge	m.z	Mass	Mass.Error..ppm.	Mass.Error..Da.	Uncalibrated.Mass.Error..ppm.	Uncalibrated.Mass.Error..Da.	PEP	Score	Ratio.H.L	Ratio.H.L.normalized	Intensity	Intensity.L	Intensity.H
ARTKQTARKSTGGKAPR	_ARTKQTARKS(ad)TGGK(ac)APR_	Q16695;P68431;Q6NXT2;Q5TEC6;Q71DI3;P84243;K7EMV3;B4DEB1;K7EP01	Q16695;P68431;Q5TEC6;Q71DI3;P84243	Q71DI3	Histone H3.1t;Histone H3.1;Histone H3.3C;Histone H3;Histone H3.2;Histone H3.3	ARH3	600.286	4	600.035	2396.11	0.15671	9.403e-05	-0.31062	-0.00018638	1.6534e-05	55.546	0.020444	0.02166	36350000	35742000	608640
KSTGGKAPR	_KS(ad)TGGK(ac)APR_	Q16695;P68431;Q6NXT2;Q5TEC6;Q71DI3;P84243;K7EMV3;B4DEB1;K7EP01	Q16695;P68431;Q5TEC6;Q71DI3;P84243	Q71DI3	Histone H3.1t;Histone H3.1;Histone H3.3C;Histone H3;Histone H3.2;Histone H3.3	ARH3	742.801	2	742.8	1483.59	-0.061897	-4.5977e-05	NA	NA	0.00029673	68.657	NA	NA	5262800	5165200	97600
KSTGGKAPRKQLATKAAR	_KS(ad)TGGK(ac)APRKQLATK(ac)AAR_	P68431;Q6NXT2;Q5TEC6;Q71DI3;P84243;K7EMV3;B4DEB1;K7EP01	P68431;Q5TEC6;Q71DI3;P84243	Q71DI3	Histone H3.1;Histone H3.3C;Histone H3;Histone H3.2;Histone H3.3	ARH3	624.304	4	624.305	2493.19	0.021977	1.3721e-05	NA	NA	8.7624e-08	70.094	NA	NA	6259200	6259200	0
PDPAKSAPAPKKGSK	_PDPAKS(ad)APAPKKGSK_	P23527;Q5QNW6;Q5QNW6-2	P23527;Q5QNW6	P23527	Histone H2B type 1-O;Histone H2B type 2-F	ARH3	674.303	3	673.969	2018.89	0.15054	0.00010146	NA	NA	3.699e-05	66.636	NA	NA	9929400	9821000	108450
PELAKSAPAPK	_PELAKS(ad)APAPK_	Q99880	Q99880	Q99880	Histone H2B type 1-L	ARH3	825.351	2	825.352	1648.69	0.34448	0.00028432	NA	NA	1.3152e-06	88.78	NA	NA	4318100	4026600	291540
PEPAKSAPAPK	_PEPAKS(ad)APAPK_	B2R4S9;P62807;P06899;Q16778	B2R4S9;P06899;Q16778	Q16778	Histone H2B;Histone H2B type 1-C/E/F/G/I;Histone H2B type 1-J;Histone H2B type 2-E	ARH3	817.336	2	817.337	1632.66	0.12277	0.00010034	-0.067849	-5.5455e-05	5.7433e-06	82.349	0.042406	0.04467	41139000	36951000	4188200
PEPAKSAPAPK	_PEPAKS(ad)APAPK_	B2R4S9;P62807;P06899;Q16778	B2R4S9;P06899;Q16778	Q16778	Histone H2B;Histone H2B type 1-C/E/F/G/I;Histone H2B type 1-J;Histone H2B type 2-E	ARH3	545.227	3	545.227	1632.66	0.13464	7.3411e-05	-0.094225	-5.1374e-05	4.0789e-07	83.061	0.043342	0.045896	36990000	34838000	2152600
PEPAKSAPAPKKGSK	_PEPAKS(ad)APAPKKGSK_	B2R4S9;P62807;P06899;Q16778	B2R4S9;P06899;Q16778	Q16778	Histone H2B;Histone H2B type 1-C/E/F/G/I;Histone H2B type 1-J;Histone H2B type 2-E	ARH3	678.641	3	678.641	2032.9	0.012812	8.6951e-06	NA	NA	3.7796e-06	78.326	NA	NA	30046000	29139000	907010
PEPAKSAPAPKKGSK	_PEPAKS(ad)APAPKKGSK_	B2R4S9;P62807;P06899;Q16778	B2R4S9;P06899;Q16778	Q16778	Histone H2B;Histone H2B type 1-C/E/F/G/I;Histone H2B type 1-J;Histone H2B type 2-E	ARH3	509.232	4	509.233	2032.9	-0.26616	-0.00013554	NA	NA	2.2795e-06	82.59	0.023039	0.024299	40120000	39535000	584790
PEPAKSAPAPKKGSK	_PEPAKS(ad)APAPKK(ac)GSK_	B2R4S9;P62807;P06899;Q16778	B2R4S9;P06899;Q16778	Q16778	Histone H2B;Histone H2B type 1-C/E/F/G/I;Histone H2B type 1-J;Histone H2B type 2-E	ARH3	692.644	3	692.645	2074.91	0.14506	0.00010048	NA	NA	8.183e-05	67.227	0.038198	0.040154	7697300	7528400	168830
PEPAKSAPAPKKGSKK	_PEPAKS(ad)APAPKKGSKK_	B2R4S9;P62807;P06899;Q16778	B2R4S9;P06899;Q16778	Q16778	Histone H2B;Histone H2B type 1-C/E/F/G/I;Histone H2B type 1-J;Histone H2B type 2-E	ARH3	541.507	4	541.257	2161	0.040198	2.1757e-05	-0.19393	-0.00010497	7.6789e-06	62.813	0.023	0.024486	24114000	23502000	611560
PEPAKSAPAPKKGSKKAVTK	_PEPAKS(ad)APAPKKGSKKAVTK_	B2R4S9;P62807;P06899;Q16778	B2R4S9;P06899;Q16778	Q16778	Histone H2B;Histone H2B type 1-C/E/F/G/I;Histone H2B type 1-J;Histone H2B type 2-E	ARH3	513.054	5	513.056	2560.25	-2.4536	-0.0012588	NA	NA	1.1996e-05	63.302	0.016907	0.017923	10721000	10518000	203380
PEPAKSAPAPKKGSKKAVTKAQKK	_PEPAKS(ad)APAPKKGSKKAVTKAQKK_	B2R4S9;P62807;P06899;Q16778	B2R4S9;P06899;Q16778	Q16778	Histone H2B;Histone H2B type 1-C/E/F/G/I;Histone H2B type 1-J;Histone H2B type 2-E	ARH3	503.93	6	503.596	3015.53	-0.30268	-0.00015243	NA	NA	0.00031232	50.783	0.020678	0.022298	3682300	3640000	42315
PEPSKSAPAPK	_PEPS(ad)K(me)SAPAPK_	U3KQK0;Q99877	U3KQK0	U3KQK0	Histone H2B;Histone H2B type 1-N	ARH3	555.564	3	555.23	1662.67	-0.012388	-6.8782e-06	NA	NA	0.00077918	70.889	0.058838	0.062768	10036000	9623700	412270
PEPVKSAPVPK	_PEPVKS(ad)APVPK_	Q99879	Q99879	Q99879	Histone H2B type 1-M	ARH3	845.869	2	845.368	1688.72	-0.39724	-0.00033581	NA	NA	0.00026299	74.853	NA	NA	4157500	4157500	0
SGRGKGGKGLGKGGAKR	_(ac)S(ad)GRGKGGKGLGKGGAKR_	P62805	P62805	P62805	Histone H4	ARH3	539.255	4	539.255	2152.99	-0.10385	-5.6003e-05	-0.62262	-0.00033575	2.1761e-05	60.549	0.019029	0.019873	172490000	169000000	3484000
SGRGKGGKGLGKGGAKR	_(ac)S(ad)GRGKGGKGLGKGGAK(ac)R_	P62805	P62805	P62805	Histone H4	ARH3	550.008	4	549.757	2195	0.23408	0.00012869	-0.13319	-7.3224e-05	2.7997e-05	58.758	0.021212	0.022082	54196000	52631000	1564800
SGRGKGGKGLGKGGAKR	_(ac)S(ad)GRGKGGKGLGKGGAK(ac)R_	P62805	P62805	P62805	Histone H4	ARH3	732.674	3	732.674	2195	0.047026	3.4455e-05	NA	NA	6.9587e-05	62.055	0.020048	0.021284	30513000	29799000	714050
SGRGKGGKGLGKGGAKR	_(ac)S(ad)GRGK(ac)GGKGLGKGGAK(ac)R_	P62805	P62805	P62805	Histone H4	ARH3	746.678	3	746.677	2237.01	0.30271	0.00022603	NA	NA	7.5053e-07	76.82	NA	NA	11994000	11847000	146910
SGRGKGGKGLGKGGAKRHR	_(ac)S(ad)GRGKGGKGLGKGGAK(ac)RHR_	P62805	P62805	P62805	Histone H4	ARH3	498.84	5	498.639	2488.16	-0.6638	-0.000331	-1.0593	-0.0005282	1.8918e-08	69.188	0.0096321	0.010216	10682000	10494000	187600
