# Supplementary material for: Serine ADP-ribosylation reversal by the hydrolase ARH3
Source: eLife. 2017 Jun 26;6:e28533. doi: 10.7554/eLife.28533 (PMC5552275; doi:10.7554/eLife.28533)
Supplement: Figure 5—source data 1. — List of identified Ser-ADPr sites from SILAC experiments performed to quantify core histone Ser-ADPr marks from Control and ARH3 KO U2OS cells (Figure 5C–D). DOI: http://dx.doi.org/10.7554/eLife.28533.012 [file elife-28533-fig5-data1.xlsx]

## Sheet: ADPr (S) Sites
Proteins	Positions within proteins	Leading proteins	Protein	PEP	Score	Diagnostic peak	Amino acid	Sequence window	Modification window	Peptide window coverage	Charge	Mass error [ppm]	Ratio H/L WT_0min	Ratio H/L normalized WT_0min	Ratio H/L WT_10min	Ratio H/L normalized WT_10min	Ratio H/L WT_120min	Ratio H/L normalized WT_120min	Ratio H/L ARH3ko_0min	Ratio H/L normalized ARH3ko_0min	Ratio H/L ARH3ko_10min	Ratio H/L normalized ARH3ko_10min	Ratio H/L ARH3ko_120min	Ratio H/L normalized ARH3ko_120min	Intensity WT_0min	Intensity L WT_0min	Intensity H WT_0min	Intensity WT_10min	Intensity L WT_10min	Intensity H WT_10min	Intensity WT_120min	Intensity L WT_120min	Intensity H WT_120min	Intensity ARH3ko_0min	Intensity L ARH3ko_0min	Intensity H ARH3ko_0min	Intensity ARH3ko_10min	Intensity L ARH3ko_10min	Intensity H ARH3ko_10min	Intensity ARH3ko_120min	Intensity L ARH3ko_120min	Intensity H ARH3ko_120min
sp|O60814|H2B1K_HUMAN;sp|P57053|H2BFS_HUMAN;tr|B2R4S9|B2R4S9_HUMAN;sp|P62807|H2B1C_HUMAN;sp|Q16778|H2B2E_HUMAN	15;15;15;15;15	sp|O60814|H2B1K_HUMAN;sp|P57053|H2BFS_HUMAN;tr|B2R4S9|B2R4S9_HUMAN;sp|Q16778|H2B2E_HUMAN	tr|B2R4S9|B2R4S9_HUMAN	0.000646283	78.987	+	S	_MPEPAKSAPAPKKGSKKAVTKAQKKDGKKR;_MPEPAKSAPAPKKGSKKAVTKAQKKDGRKR	X;X;X;X;X;X;Acetyl (K);ADPr (S);X;X;X;X;Acetyl (K);Acetyl (K);X;ADPr (S);Acetyl (K);Acetyl (K);X;X;X;Acetyl (K);X;X;Acetyl (K);X;X;X;X;X;X	XXPPPPPPPPPPPPPPPPPPPPPPPPXXXXX	3	-3.3762													0	0	0	0	0	0	0	0	0	0	0	0	2140400	2140400	0	2655100	2655100	0
sp|O60814|H2B1K_HUMAN;sp|P57053|H2BFS_HUMAN;tr|B2R4S9|B2R4S9_HUMAN;sp|P62807|H2B1C_HUMAN;sp|Q16778|H2B2E_HUMAN	7;7;7;7;7	sp|O60814|H2B1K_HUMAN;sp|P57053|H2BFS_HUMAN;tr|B2R4S9|B2R4S9_HUMAN;sp|Q16778|H2B2E_HUMAN	tr|B2R4S9|B2R4S9_HUMAN	1.30596e-09	129.47	+	S	_________MPEPAKSAPAPKKGSKKAVTKA	X;X;X;X;X;X;X;X;X;X;X;X;X;X;Acetyl (K);ADPr (S);X;X;X;X;Acetyl (K);Acetyl (K);X;ADPr (S);Acetyl (K);Acetyl (K);X;X;X;Acetyl (K);X	XXXXXXXXXXPPPPPPPPPPPPPPPPPPPPP	2	-0.78154			0.43953	0.4119	2.0498	2.013	0.11885	0.11666	0.10312	0.099282	0.050405	0.046367	39130000	0	39130000	1414800000	945370000	469440000	287740000	93320000	194420000	4395300000	3924900000	470440000	7007000000	6448200000	558820000	15973000000	15543000000	429800000
sp|Q99878|H2A1J_HUMAN;sp|Q96KK5|H2A1H_HUMAN;sp|P0C0S8|H2A1_HUMAN;sp|P20671|H2A1D_HUMAN;sp|Q16777|H2A2C_HUMAN;sp|Q6FI13|H2A2A_HUMAN;sp|Q8IUE6|H2A2B_HUMAN;sp|Q93077|H2A1C_HUMAN	2;2;2;2;2;2;2;2	sp|Q99878|H2A1J_HUMAN;sp|P20671|H2A1D_HUMAN;sp|Q16777|H2A2C_HUMAN;sp|Q6FI13|H2A2A_HUMAN;sp|Q8IUE6|H2A2B_HUMAN;sp|Q93077|H2A1C_HUMAN	sp|Q6FI13|H2A2A_HUMAN	1.6374e-07	112.42	+	S	______________MSGRGKQGGKARAKAKS;______________MSGRGKQGGKARAKAKT	X;X;X;X;X;X;X;X;X;X;X;X;X;X;X;ADPr (S);X;X;X;Acetyl (K);X;X;X;Acetyl (K);X;X;X;X;X;Methyl (KR);X	XXXXXXXXXXXXXXXPPPPPPPPPPPPPPPX	4	-0.22291			0.62963	0.61136			0.73408	0.716	0.20113	0.19181	0.057798	0.052712	0	0	0	130350000	77590000	52764000	0	0	0	96921000	55381000	41540000	566560000	455500000	111060000	2230400000	2100000000	130320000
sp|P58876|H2B1D_HUMAN	7	sp|P58876|H2B1D_HUMAN	sp|P58876|H2B1D_HUMAN	1.05398e-07	119.87	+	S	_________MPEPTKSAPAPKKGSKKAVTKA	X;X;X;X;X;X;X;X;X;X;X;X;X;X;X;ADPr (S);X;X;X;X;Acetyl (K);Acetyl (K);X;ADPr (S);Acetyl (K);Acetyl (K);X;X;X;Acetyl (K);X	XXXXXXXXXXPPPPPPPPPPPPPPPPXXXXX	2	-0.18745			0.53782	0.50652			0.19931	0.19501	0.17082	0.16207	0.060289	0.054628	0	0	0	99230000	65172000	34058000	0	0	0	191920000	160280000	31638000	405390000	344570000	60812000	896100000	831630000	64470000
sp|P62805|H4_HUMAN	2	sp|P62805|H4_HUMAN	sp|P62805|H4_HUMAN	1.25989e-10	154.48	+	S	______________MSGRGKGGKGLGKGGAK	X;X;X;X;X;X;X;X;X;X;X;X;X;X;X;ADPr (S);X;X;X;Acetyl (K);X;X;Acetyl (K);X;X;X;Acetyl (K);X;X;X;Acetyl (K)	XXXXXXXXXXXXXXXPPPPPPPPPPPPPPPP	4	0.70076			0.55217	0.54209	8.5532	8.0785	0.18133	0.1796	0.12188	0.11482	0.051714	0.047594	0	0	0	644910000	402340000	242570000	12568000	1687600	10880000	1999600000	1642200000	357370000	6434900000	5702600000	732240000	22721000000	21852000000	869650000
sp|P68431|H31_HUMAN;sp|Q71DI3|H32_HUMAN;tr|Q5TEC6|Q5TEC6_HUMAN	29;29;29	sp|P68431|H31_HUMAN;sp|Q71DI3|H32_HUMAN;tr|Q5TEC6|Q5TEC6_HUMAN	sp|Q71DI3|H32_HUMAN	2.07774e-08	124.12	+	S	GKAPRKQLATKAARKSAPATGGVKKPHRYRP	X;Acetyl (K);Methyl (KR);X;X;Methyl (KR);Acetyl (K);Methyl (KR);X;X;X;X;Acetyl (K);Methyl (KR);X;X;Methyl (KR);Acetyl (K);Methyl (KR);ADPr (S);X;X;X;X;X;X;X;Methyl (KR);Methyl (KR);X;X;Methyl (KR);X;Methyl (KR);X	XXXXXXXXXXXPPPPPPPPPPPPPPPPPXXX	3	0.68548			0.29732	0.27539	0.52812	0.48589	0.2958	0.29965	0.17125	0.16051	0.07468	0.063625	0	0	0	167350000	133590000	33764000	87771000	63960000	23812000	154310000	117200000	37111000	436250000	371490000	64755000	2709600000	2569300000	140350000
sp|P68431|H31_HUMAN;sp|Q6NXT2|H3C_HUMAN;sp|P84243|H33_HUMAN;tr|K7EMV3|K7EMV3_HUMAN;tr|B4DEB1|B4DEB1_HUMAN;sp|Q71DI3|H32_HUMAN;tr|K7EP01|K7EP01_HUMAN;tr|Q5TEC6|Q5TEC6_HUMAN	11;11;11;11;11;11;11;11	sp|P68431|H31_HUMAN;sp|P84243|H33_HUMAN;sp|Q71DI3|H32_HUMAN;tr|K7EP01|K7EP01_HUMAN;tr|Q5TEC6|Q5TEC6_HUMAN	sp|Q71DI3|H32_HUMAN	3.93491e-09	132.57	+	S	_____MARTKQTARKSTGGKAPRKQLATKAA	X;X;X;X;X;X;X;Methyl (KR);X;Acetyl (K);Methyl (KR);X;X;X;Methyl (KR);Acetyl (K);Methyl (KR);ADPr (S);X;X;X;Acetyl (K);Methyl (KR);X;X;Methyl (KR);Acetyl (K);Methyl (KR);X;X;X;X;Acetyl (K);Methyl (KR);X;X	XXXXXXPPPPPPPPPPPPPPPPPPPPPPPPP	4	-0.16293	34.786	34.443	0.4651	0.4389	2.8897	2.6911	0.52457	0.51878	0.36613	0.34969	0.11978	0.1061	12847000	227820	12619000	256690000	160430000	96256000	23920000	6316200	17604000	305000000	196840000	108160000	1505500000	1204700000	300790000	8858100000	8235700000	622410000
sp|Q16695|H31T_HUMAN	11	sp|Q16695|H31T_HUMAN	sp|Q16695|H31T_HUMAN	3.93491e-09	132.57	+	S	_____MARTKQTARKSTGGKAPRKQLATKVA	X;X;X;X;X;X;X;Methyl (KR);X;Acetyl (K);Methyl (KR);X;X;X;Methyl (KR);Acetyl (K);Methyl (KR);ADPr (S);X;X;X;Acetyl (K);Methyl (KR);X;X;X;Acetyl (K);X;X;X;X;Acetyl (K);X;X	XXXXXXPPPPPPPPPPPPPPPPPPPPPPPXX	4	-0.16293	34.786	34.443	0.4651	0.4389	2.8897	2.6911	0.70178	0.69714	0.37288	0.35679	0.09681	0.088993	12847000	227820	12619000	256690000	160430000	96256000	23920000	6316200	17604000	302030000	194680000	107350000	1502400000	1202200000	300200000	8749600000	8146900000	602680000
sp|Q16695|H31T_HUMAN	29	sp|Q16695|H31T_HUMAN	sp|Q16695|H31T_HUMAN	2.07774e-08	124.12	+	S	GKAPRKQLATKVARKSAPATGGVKKPHRYRP	X;Acetyl (K);Methyl (KR);X;X;Methyl (KR);Acetyl (K);Methyl (KR);X;X;X;X;Acetyl (K);X;X;Methyl (KR);Acetyl (K);Methyl (KR);ADPr (S);X;X;X;X;X;X;X;Methyl (KR);Methyl (KR);X;X;Methyl (KR);X;Methyl (KR);X	XXXXXXXXXXXXXXPPPPPPPPPPPPPPXXX	3	0.68548			0.29732	0.27539	0.52812	0.48589	0.2958	0.29965	0.1716	0.16186	0.086251	0.075277	0	0	0	167350000	133590000	33764000	87771000	63960000	23812000	154310000	117200000	37111000	419720000	357400000	62318000	2484800000	2348700000	136180000
sp|Q5QNW6|H2B2F_HUMAN;sp|Q5QNW6-2|H2B2F_HUMAN;sp|Q93079|H2B1H_HUMAN	7;7;7	sp|Q5QNW6|H2B2F_HUMAN;sp|Q93079|H2B1H_HUMAN	sp|Q93079|H2B1H_HUMAN	2.56941e-06	113.63	+	S	_________MPDPAKSAPAPKKGSKKAVTKA;_________MPDPAKSAPAPKKGSKKAVTKV	X;X;X;X;X;X;X;X;X;X;X;X;X;X;X;ADPr (S);X;X;X;X;Acetyl (K);Acetyl (K);X;ADPr (S);Acetyl (K);Acetyl (K);X;X;X;Acetyl (K);X	XXXXXXXXXXPPPPPPPPPPPPPPPPXXXXX	2	0.63813							0.12054	0.11335			0.048631	0.044387	0	0	0	0	0	0	0	0	0	6825000	6110600	714390	7969900	7969900	0	64603000	64199000	404140
sp|Q8N257|H2B3B_HUMAN	7	sp|Q8N257|H2B3B_HUMAN	sp|Q8N257|H2B3B_HUMAN	0.00027115	82.85	+	S	_________MPDPSKSAPAPKKGSKKAVTKA	X;X;X;X;X;X;X;X;X;X;X;X;X;X;Acetyl (K);Methyl (KR);ADPr (S);X;X;X;X;Acetyl (K);Methyl (KR);Acetyl (K);X;ADPr (S);Acetyl (K);Acetyl (K);X;X;X;Acetyl (K);X	XXXXXXXXXXXXXXXPPPPPPPPPPPXXXXX	3	0.40943											0.048631	0.044387	0	0	0	0	0	0	0	0	0	0	0	0	0	0	0	10122000	9718400	404140
sp|Q99879|H2B1M_HUMAN	7	sp|Q99879|H2B1M_HUMAN	sp|Q99879|H2B1M_HUMAN	1.73107e-07	113.34	+	S	_________MPEPVKSAPVPKKGSKKAINKA	X;X;X;X;X;X;X;X;X;X;X;X;X;X;X;ADPr (S);X;X;X;X;X;Acetyl (K);X;X;Acetyl (K);Acetyl (K);X;X;X;Acetyl (K);X	XXXXXXXXXXPPPPPPPPPPPPPPPPXXXXX	2	-0.22358							0.083533	0.083573	0.067687	0.065069	0.036106	0.031779	0	0	0	0	0	0	0	0	0	350730000	327520000	23211000	501820000	478360000	23459000	1272300000	1229500000	42827000
sp|Q99880|H2B1L_HUMAN	15	sp|Q99880|H2B1L_HUMAN	sp|Q99880|H2B1L_HUMAN	5.08433e-06	94.313	+	S	_MPELAKSAPAPKKGSKKAVTKAQKKDGKKR	X;X;X;X;X;X;Acetyl (K);ADPr (S);X;X;X;X;Acetyl (K);Acetyl (K);X;ADPr (S);Acetyl (K);Acetyl (K);X;X;X;Acetyl (K);X;X;Acetyl (K);X;X;X;X;X;X	XXPPPPPPPPPPPPPPPPPPPPPPPPXXXXX	3	-3.3762									0.074235	0.072452			0	0	0	0	0	0	0	0	0	0	0	0	27558000	25080000	2477600	0	0	0
sp|Q99880|H2B1L_HUMAN	7	sp|Q99880|H2B1L_HUMAN	sp|Q99880|H2B1L_HUMAN	7.01979e-08	123.98	+	S	_________MPELAKSAPAPKKGSKKAVTKA	X;X;X;X;X;X;X;X;X;X;X;X;X;X;X;ADPr (S);X;X;X;X;Acetyl (K);Acetyl (K);X;ADPr (S);Acetyl (K);Acetyl (K);X;X;X;Acetyl (K);X	XXXXXXXXXXPPPPPPPPPPPPPPPPXXXXX	2	0.38771			0.60298	0.57786			0.10146	0.10145	0.10005	0.094117	0.048631	0.044387	0	0	0	51870000	31446000	20424000	0	0	0	223750000	203620000	20129000	373710000	343700000	30017000	921830000	875800000	46029000
sp|Q9BTM1|H2AJ_HUMAN;sp|Q9BTM1-2|H2AJ_HUMAN	2;2	sp|Q9BTM1|H2AJ_HUMAN	sp|Q9BTM1|H2AJ_HUMAN	0.000345829	81.335	+	S	______________MSGRGKQGGKVRAKAKS	X;X;X;X;X;X;X;X;X;X;X;X;X;X;X;ADPr (S);X;X;X;Acetyl (K);X;X;X;Acetyl (K);X;X;X;X;X;Methyl (KR);X	XXXXXXXXXXXXXXXPPPPPPPPPXXXXXXX	2	-0.4343			0.59998	0.56803			0.74885	0.73279	0.22029	0.21593	0.05822	0.052044	0	0	0	1350600	831760	518880	0	0	0	1443500	767430	676110	18368000	15378000	2990000	150100000	139970000	10133000
tr|U3KQK0|U3KQK0_HUMAN;sp|Q99877|H2B1N_HUMAN	5;5	tr|U3KQK0|U3KQK0_HUMAN	tr|U3KQK0|U3KQK0_HUMAN	1.82934e-07	110.8	+	S	___________MPEPSKSAPAPKKGSKKAVT	X;X;X;X;X;X;X;X;X;X;X;X;X;X;X;ADPr (S);Methyl (KR);ADPr (S);X;X;X;X;Acetyl (K);Acetyl (K);X;ADPr (S);Acetyl (K);Acetyl (K);X;X;X	XXXXXXXXXXXXPPPPPPPPPPPPPPPPXXX	3	0.6634			0.52708	0.51191			0.17318	0.17445	0.15652	0.14914	0.060779	0.054749	0	0	0	44627000	27944000	16682000	0	0	0	55496000	47282000	8213500	130820000	111930000	18881000	451630000	425970000	25662000
tr|U3KQK0|U3KQK0_HUMAN;sp|Q99877|H2B1N_HUMAN	7;7	tr|U3KQK0|U3KQK0_HUMAN	tr|U3KQK0|U3KQK0_HUMAN	1.76669e-07	111.53	+	S	_________MPEPSKSAPAPKKGSKKAVTKA	X;X;X;X;X;X;X;X;X;X;X;X;X;X;X;ADPr (S);X;X;X;X;Acetyl (K);Acetyl (K);X;ADPr (S);Acetyl (K);Acetyl (K);X;X;X;Acetyl (K);X	XXXXXXXXXXPPPPPPPPPPPPPPPPXXXXX	3	0.40943							0.189	0.18201	0.17979	0.17045	0.054705	0.04982	0	0	0	0	0	0	0	0	0	26403000	21874000	4528900	42677000	36990000	5686900	229790000	212270000	17517000
