# Supplementary figures and images for: Serine ADP-ribosylation reversal by the hydrolase ARH3
Source: eLife journal article supplement (doi:10.7554/elife.28533), 2017-06-26

Figure 2-figure supplement 1

A

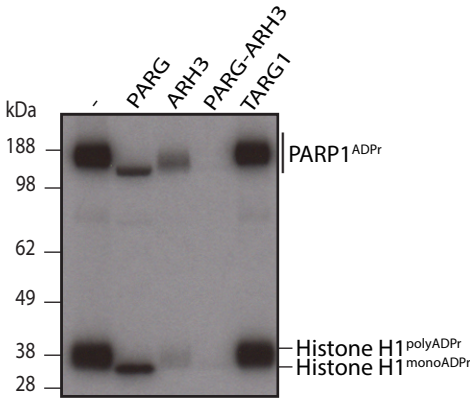

B

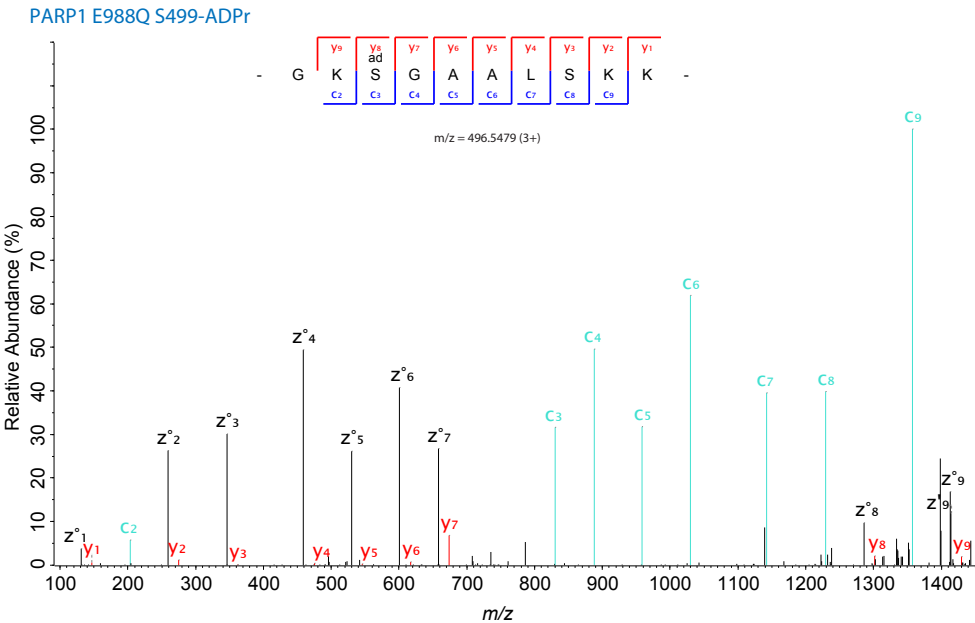

C

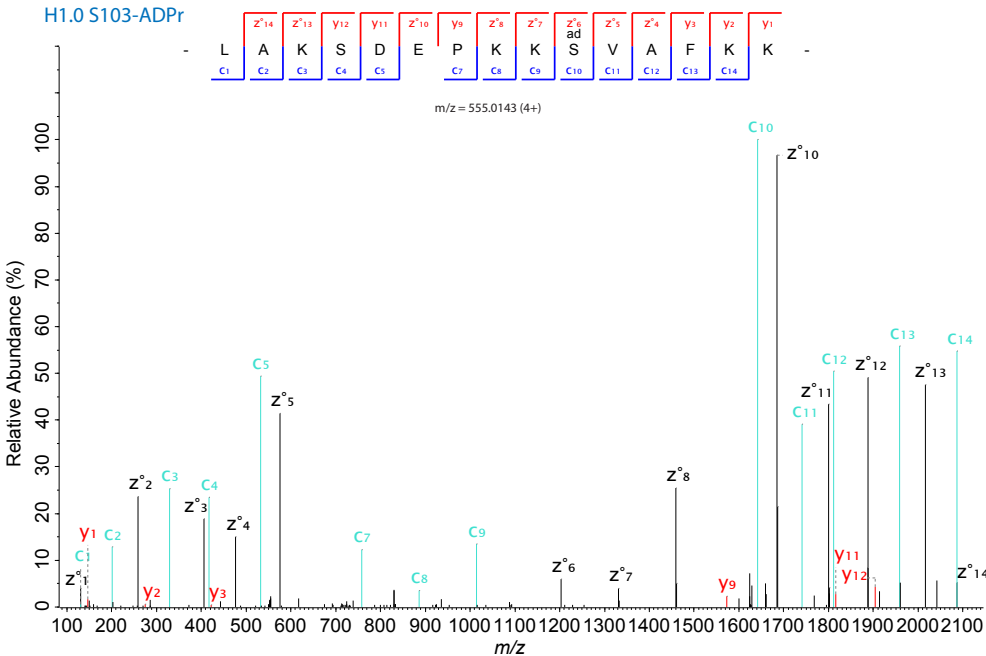

Supplement: supp [file elife-28533-supp-v1.zip]

Figure 1-figure supplement 1

A

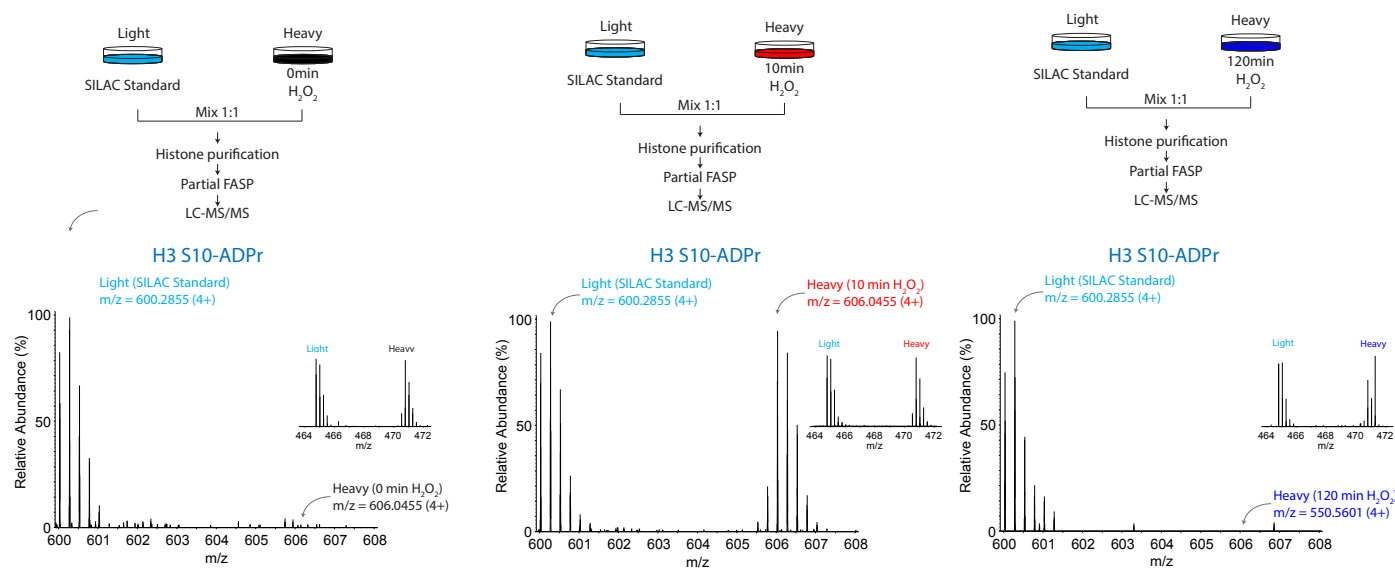

B

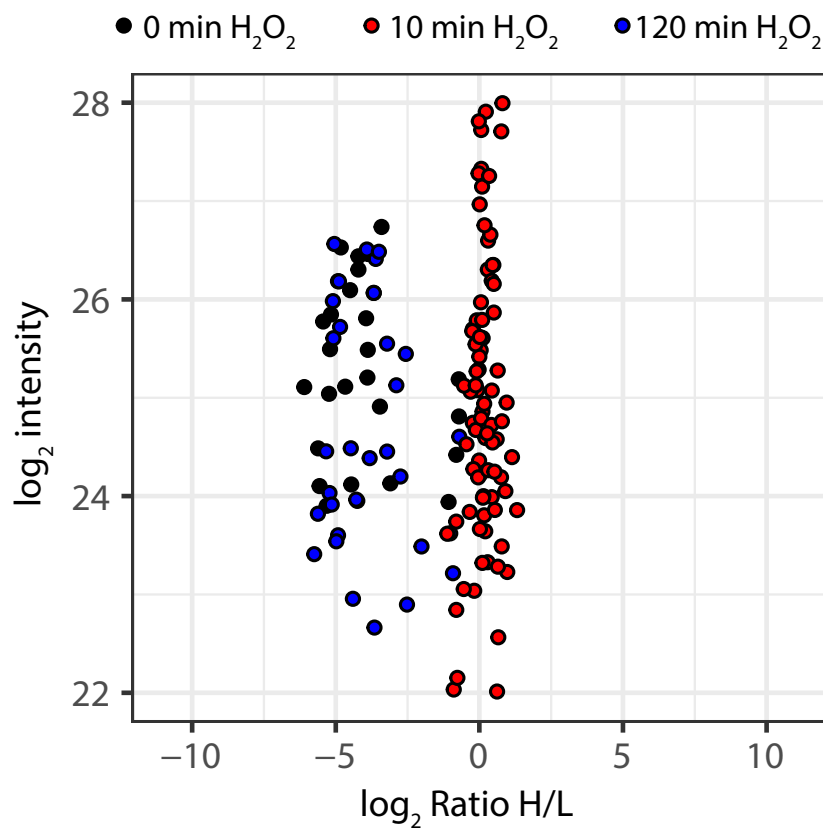

Supplement: supp [file elife-28533-supp-v1.zip]
